# Supplementary material for: Inhibitory Effects of a Novel Chrysin-Derivative, CPD 6, on Acute and Chronic Skin Inflammation
Source: PubMed Central journal article supplement (PMC6600461; doi:10.3390/ijms20112607), 2019-05-28

## *Supplementary Material*

# **Inhibitory effects of a novel chrysin-derivative, CPD 6, on acute and chronic skin inflammation**

Chan-Hee Yu <sup>1,a</sup>, Beomseon Suh <sup>1,a</sup>, Iljin Shin <sup>2</sup>, Eun-Hye Kim <sup>1</sup>, Donghyun Kim <sup>1</sup>, Young-Jun Shin <sup>1</sup>, Sun-Young Chang <sup>2</sup>, Seung-Hoon Baek <sup>2</sup>, Hyoungsu Kim <sup>2,\*</sup> and Ok-Nam Bae <sup>1,\*</sup>

<sup>1</sup> College of Pharmacy Institute of Pharmaceutical Science and Technology, Hanyang University, Ansan, Republic of Korea

<sup>2</sup> College of Pharmacy and Research Institute of Pharmaceutical Science and Technology (RIPST), Ajou University, Suwon, Republic of Korea

<sup>a</sup> C.-H. Yu and B. Suh contributed equally.

\* Correspondence: hkimajou@ajou.ac.kr (H. Kim); onbae@hanyang.ac.kr, +82-31-400-5805 (O.-N. Bae)

## Synthesis of CPD 1-14

CPD 1 (chrysin) was purchased from Sigma-Aldrich (MO, USA). CPDs 2-8 and CPD14 were synthesized by according to the literature procedure [1-7]. CPD 9 and CPD 10 were prepared from CPD 8 and CPD 3 by methylation and prenylation, respectively (Scheme 1). CPDs 6 and 11-13 were prepared from CPD 5 by alkylation (methylation, ethylation, *n*-propylation, and *n*-butylation).

Scheme 1. Preparation of CPDs 6, 9-13

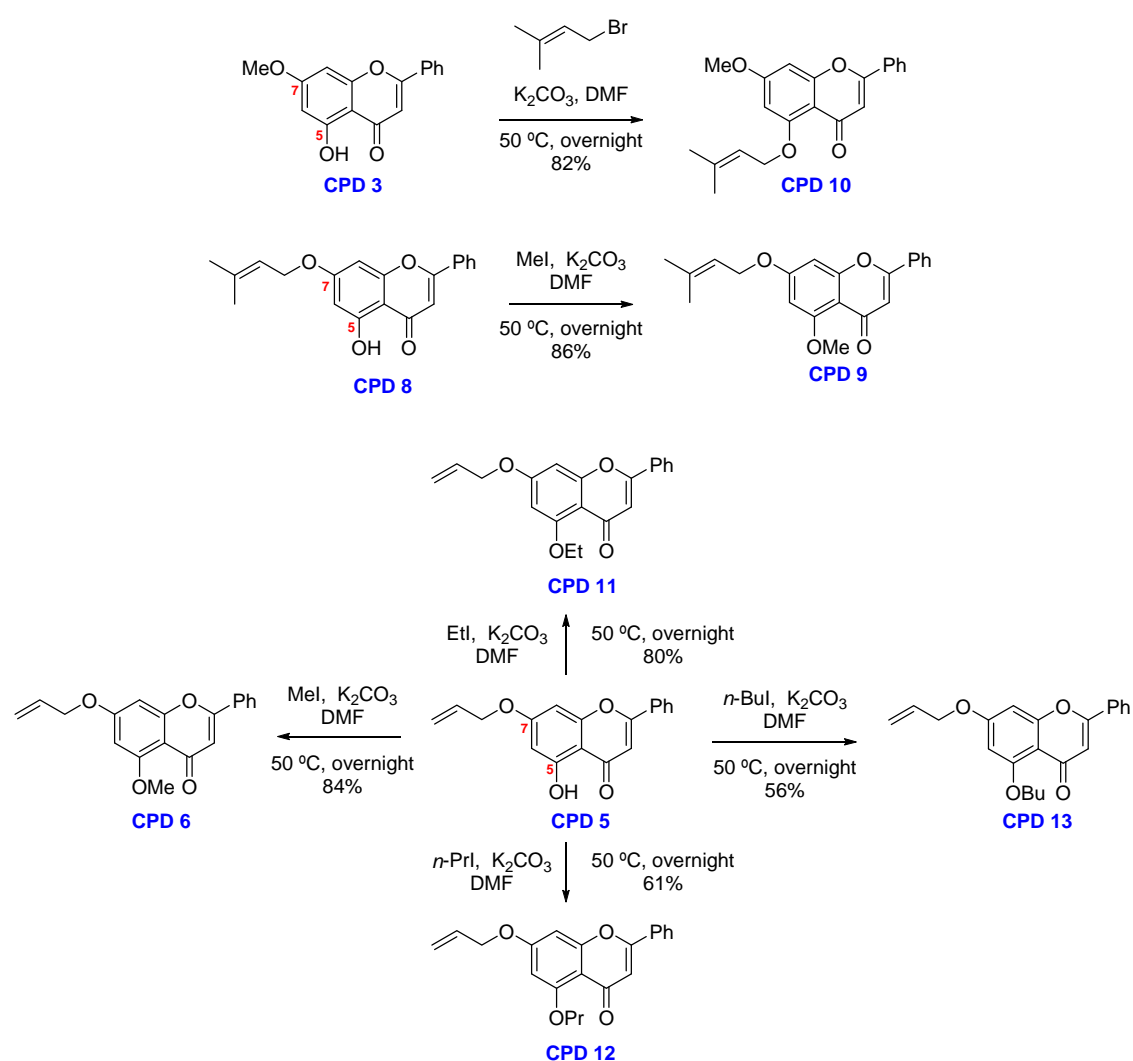

**CPD-6:** m.p 128.1 °C; <sup>1</sup>H NMR (600 MHz, CDCl<sub>3</sub>) δ 7.89-7.85 (m, 2 H), 7.52-7.48 (m, 3 H), 6.69 (d, *J* = 0.6 Hz, 1 H), 6.58 (d, *J* = 2.4 Hz, 1 H), 6.43 (d, *J* = 2.4 Hz, 1 H), 6.09 (dddd, *J* = 17.4, 10.8, 5.4, 5.4 Hz, 1 H), 5.48 (dddd, *J* = 17.4, 1.8, 1.8, 1.8 Hz, 1 H), 5.37 (dddd, *J* = 10.8, 1.2, 1.2, 1.2 Hz, 1 H), 4.65 (ddd, *J* = 13.2, 7.8, 4.8 Hz, 2 H), 3.97 (s, 3 H); <sup>13</sup>C NMR (150 MHz, CDCl<sub>3</sub>) δ 177.6, 163.0, 161.0, 160.7, 159.8, 132.1, 131.2, 128.9, 126.0, 118.6, 109.4, 109.1, 96.6, 93.7, 69.3, 56.5.

**CPD-9:** m.p 121.2 °C; <sup>1</sup>H NMR (600 MHz, CDCl<sub>3</sub>) δ 7.90-7.85 (m, 2 H), 7.54-7.46 (m, 3 H), 6.68 (s, 1 H), 6.59 (d, *J* = 2.4 Hz, 1 H), 6.40 (d, *J* = 2.4 Hz, 1 H), 5.53 (dddd, *J* = 7.2, 7.2, 1.2, 1.2 Hz, 1 H), 4.61 (d, *J* = 7.2 Hz, 2 H), 3.95 (s, 3 H), 1.84 (s, 3 H), 1.80 (s, 3 H); <sup>13</sup>C NMR (150 MHz, CDCl<sub>3</sub>) δ 177.6, 163.3, 160.9, 160.6, 159.9, 139.6, 131.6, 131.1, 128.9, 126.0, 118.5, 109.3, 109.1, 96.7, 93.5, 65.3, 56.4, 25.8, 18.3.

**CPD-10:** m.p 138.3 °C; <sup>1</sup>H NMR (600 MHz, CDCl<sub>3</sub>) δ 7.91-7.85 (m, 2 H), 7.54-7.45 (m, 3 H), 6.65 (s, 1 H), 6.56 (dd, *J* = 2.4, 0.6 Hz, 1 H), 6.38 (d, *J* = 2.4 Hz, 1 H), 5.58 (dddd, *J* = 6.6, 6.6, 1.2, 1.2 Hz, 2 H), 4.69 (d, *J* = 6.6 Hz, 2 H), 3.90 (s, 3 H), 1.79 (s, 3 H), 1.76 (s, 3 H); <sup>13</sup>C NMR (150 MHz, CDCl<sub>3</sub>) δ 177.4, 163.8, 160.5, 160.2, 159.9, 137.4, 131.7, 131.1, 128.9, 125.9, 119.5, 109.7, 109.1, 97.6, 92.9, 66.6, 55.7, 25.8, 18.4.

**CPD-11:** m.p 146.3 °C; <sup>1</sup>H NMR (600 MHz, CDCl<sub>3</sub>) δ 7.89-7.86 (m, 2 H), 7.52-7.47 (m, 3 H), 6.65 (s, 1 H), 6.56 (d, *J* = 2.4 Hz, 1 H), 6.41 (d, *J* = 2.4 Hz, 1 H), 6.08 (dddd, *J* = 17.4, 10.8, 5.4, 5.4 Hz, 1 H), 5.47 (dddd, *J* = 17.4, 1.8, 1.8, 1.8 Hz, 1 H), 5.37 (dddd, *J* = 10.8, 1.2, 1.2, 1.2 Hz, 1 H), 4.63 (ddd, *J* = 5.4, 1.8, 1.8 Hz, 2 H), 4.16 (ddd, *J* = 7.2, 7.2, 7.2 Hz, 2 H), 1.56 (dd, *J* = 7.2, 7.2 Hz, 3 H); <sup>13</sup>C NMR (150 MHz, CDCl<sub>3</sub>) δ 177.5, 162.9, 160.5, 160.3, 159.8, 132.2, 131.7, 131.1, 128.9, 126.0, 118.5, 109.6, 109.1, 97.5, 93.6, 69.2, 65.0, 14.5.

**CPD-12:** mp 112.6 °C; <sup>1</sup>H NMR (600 MHz, CDCl<sub>3</sub>) δ 7.89-7.85 (m, 2 H), 7.53-7.46 (m, 3 H), 6.63 (s, 1 H), 6.55 (d, *J* = 2.4 Hz, 1 H), 6.40 (d, *J* = 2.4 Hz, 1 H), 6.08 (dddd, *J* = 17.4, 10.8, 5.4, 5.4 Hz, 1 H), 5.47 (dddd, *J* = 17.4, 1.8, 1.8, 1.8 Hz, 1 H), 5.36 (dddd, *J* = 10.8, 1.2, 1.2, 1.2 Hz, 1 H), 4.63 (ddd, *J* = 5.4, 1.8, 1.8 Hz, 2 H), 4.03 (dd, *J* = 6.6, 6.6 Hz, 2 H), 1.96 (dddd, *J* = 7.2, 7.2, 7.2, 7.2, 7.2 Hz, 2 H), 1.13 (dd, *J* = 7.2, 7.2 Hz, 3 H); <sup>13</sup>C NMR (150 MHz, CDCl<sub>3</sub>) δ 177.4, 162.9, 160.5, 160.5, 159.8, 132.2, 131.7, 131.1, 128.9, 126.0, 118.5, 109.7, 109.2, 97.4, 93.5, 70.9, 69.2, 22.3, 10.5.

**CPD-13:** mp 117.9 °C; <sup>1</sup>H NMR (600 MHz, CDCl<sub>3</sub>) δ 7.91-7.84 (m, 2 H), 7.54-7.46 (m, 3 H), 6.62 (s, 1 H), 6.55 (d, *J* = 2.4 Hz, 1 H), 6.40 (d, *J* = 2.4 Hz, 1 H), 6.08 (dddd, *J* = 17.4, 10.2, 6.0, 6.0 Hz, 1 H), 5.47 (dddd, *J* = 17.4, 1.8, 1.8, 1.8 Hz, 1 H), 5.36 (dddd, *J* = 10.8, 1.2, 1.2, 1.2 Hz, 1 H), 4.63 (ddd, *J* = 5.4, 1.8, 1.8 Hz, 2 H), 4.07 (dd, *J* = 6.6, 6.6 Hz, 2 H), 1.97-1.87 (m, 2 H), 1.64-1.56 (m, 2 H), 1.00 (dd, *J* = 7.2, 7.2 Hz, 3 H); <sup>13</sup>C NMR (150 MHz, CDCl<sub>3</sub>) δ 177.4, 162.9, 160.6, 160.5, 159.8, 132.2, 131.7, 131.1, 128.9, 126.0, 118.5, 109.7, 109.2, 97.4, 93.5, 69.2, 30.9, 19.2, 13.8.

## References

1. For **CPD 2**: Daskiewicz, J.B.; Depeint, F.; Viorner, L.; Bayet, C.; Comte-Sarrazin, G.; Comte, G.; Gee, J.M.; Johnson, I.T.; Ndjoko, K.; Hostettmann, K.; Barron, D. Effects of Flavonoids on Cell Proliferation and Caspase Activation in a Human Colonic Cell Line HT29: An SAR Study. *J. Med. Chem.* **2005**, *48*, 2790–2804.
2. For **CPD 3**: Moreira, J.; Ribeiro, D.; Silva, P.M. A.; Nazareth, N.; Monteiro, M.; Palmeira, A.; Saraiva, L.; Pinto, M.; Bousbaa, H.; Cidade, H. New Alkoxy Flavone Derivatives Targeting Caspases: Synthesis and Antitumor Activity Evaluation. *Molecules* **2018**, *24*, 129.
3. For **CPD 4**: Khanapur, M.; Pinna, N.K.; Badiger, J. Synthesis and anti-inflammatory in vitro, in silico, and in vivo studies of flavone analogues. *Med. Chem. Res.* **2015**, *24*, 2656–2669.
4. For **CPD 5**: Kim, H.; Lim, D.; Shin, I.; Lee, D. Gram-scale synthesis of anti-pancreatic flavonoids ( $\pm$ )-8-[1-(4'-hydroxy-3'-methoxyphenyl)prop-2-en-1-yl]-chrysin and -galangin. *Tetrahedron* **2014**, *70*, 4738–4744.
5. For **CPD 6**: Aneja, R.; Khanna, R. N.; Seshadri, T. R. 6-Methoxyfuroflavone, a new component of the seeds of *Pongamia glabra*. *J. Chem. Soc.* **1963**, 163–168.
6. For **CPD 7**: Khanna, R. N.; Seshadri, T. R. Synthesis of isomers of kanjone. *Indian. J. Chem.*, **1963**, *1*, 385–387.
7. For **CPD 8**: a) Hwang, S. H.; Kim, H. Y.; Zuo, G.; Wang, Z.; Lee, J.-Y.; Lim, S. S. Anti-glycation, Carbonyl Trapping and Anti-inflammatory Activities of Chrysin Derivatives. *Molecules* **2018**, *23*, 1752. b) Wang, S.H.; Chen, C.H.; Lo, C.Y.; Feng, J.Z.; Lin, H.J.; Chang, P.Y.; Yang, L. L.; Chen, L.G.; Liu, Y. W.; Kuo, C. D.; Wu, J.Y. Synthesis and biological evaluation of novel 7-O-lipophilic substituted baicalein derivatives as potential anticancer agents. *Med. Chem. Comm.* **2015**, *6*, 1864–1873.

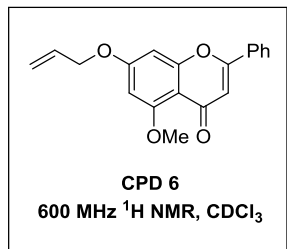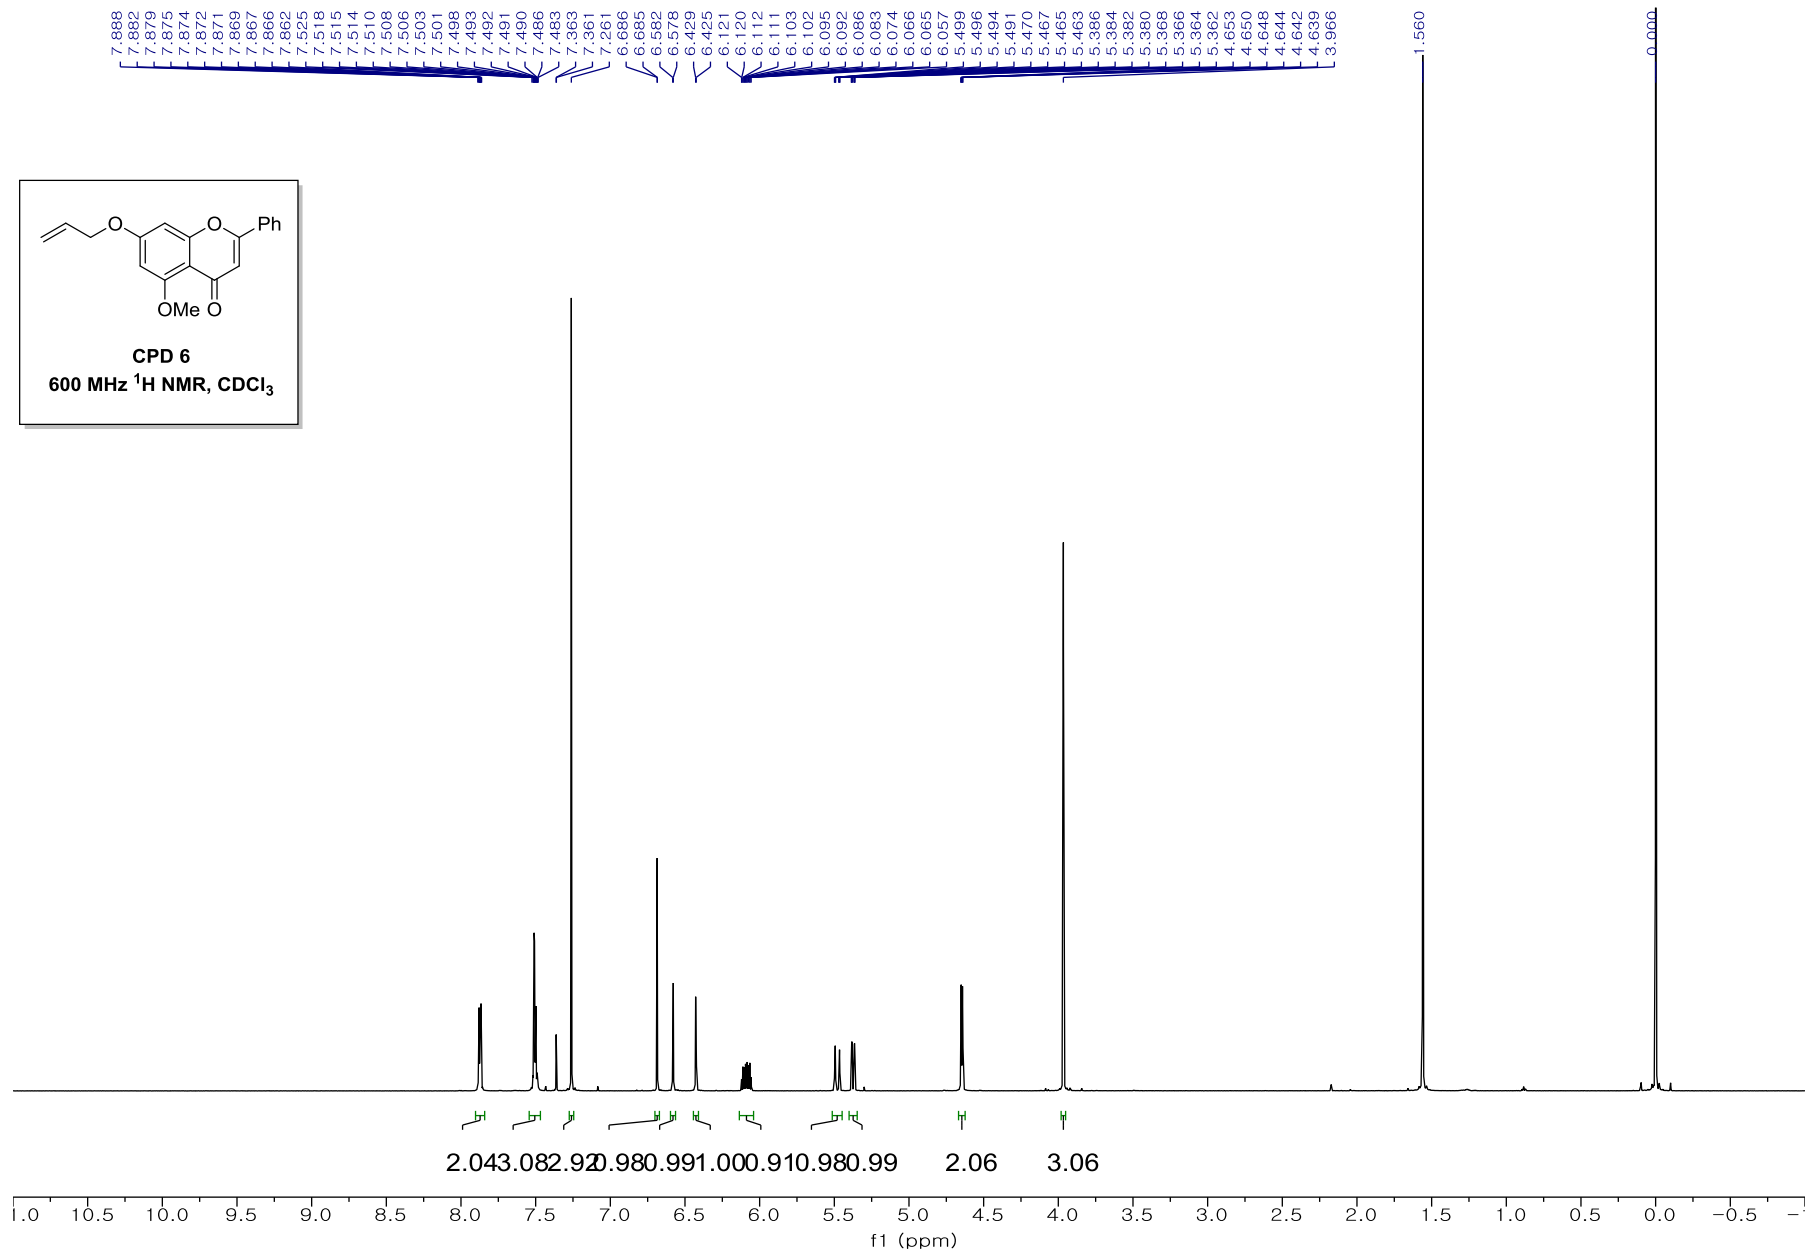

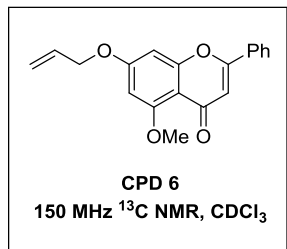

177.281  
162.813  
160.783  
160.413  
159.633  
131.998  
131.384  
130.983  
128.745  
125.750  
118.320  
109.239  
108.883  
96.474  
93.554  
77.212  
77.006  
76.788  
69.079  
56.253

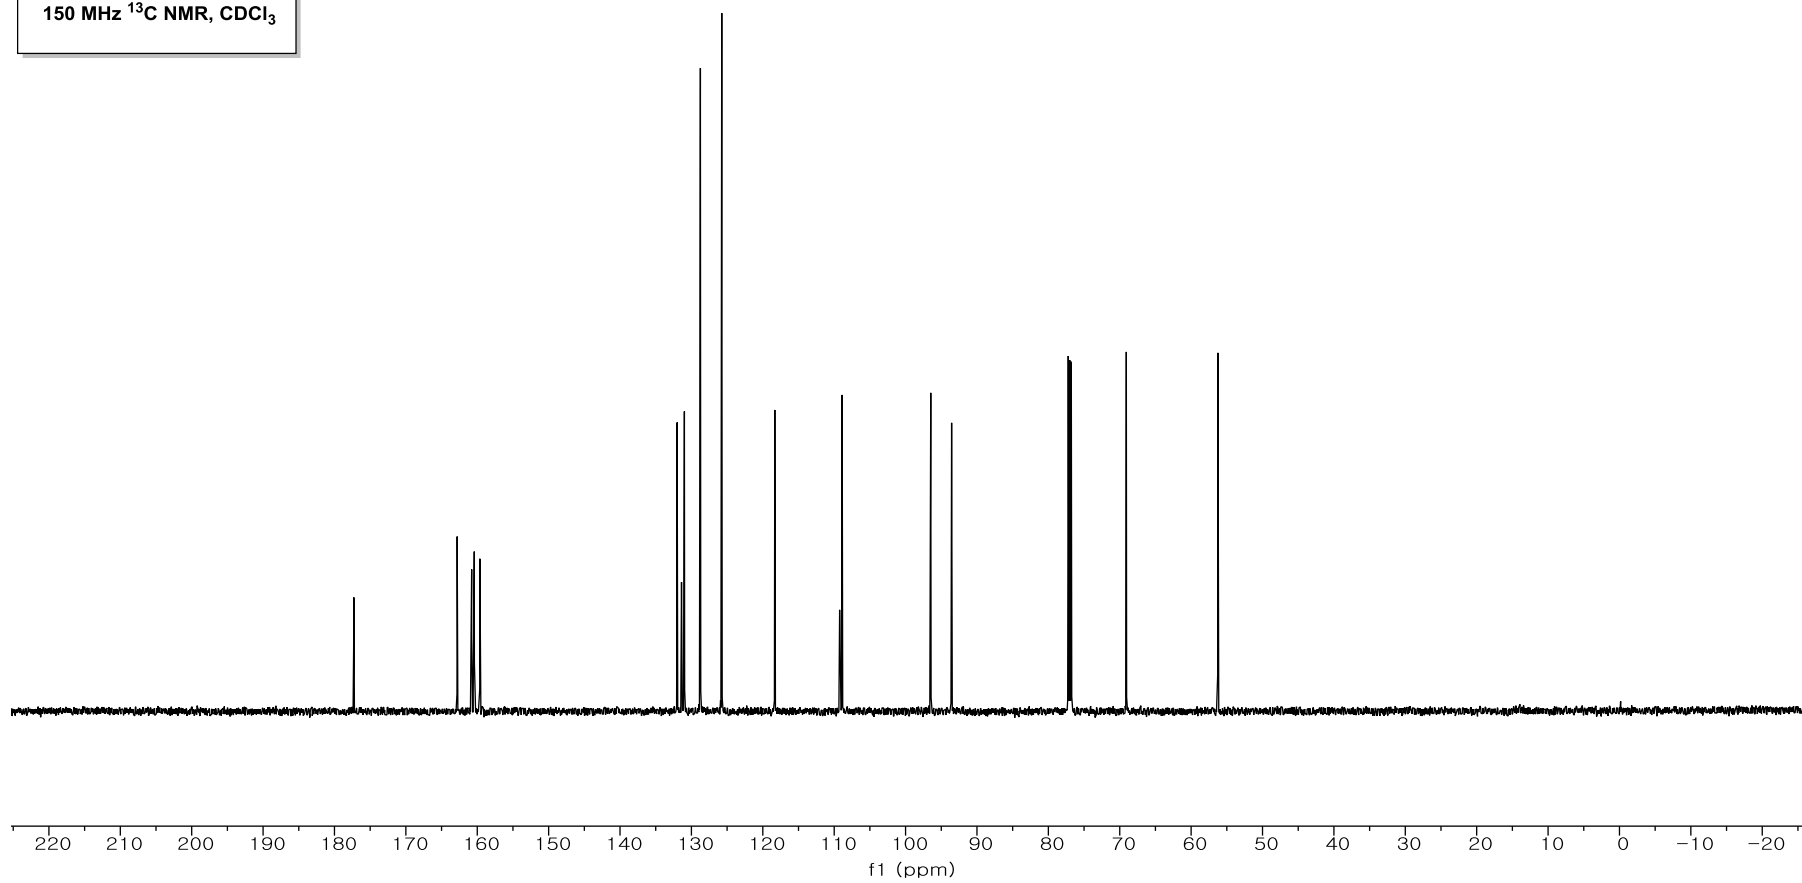

# State Parameter Editor

Ion Source: Turbo Spray  
 Ion Source Temperature Reached  
 Curtain Gas (CUR): 10.0  
 Ion Spray Voltage (IS): 5500.0  
 Temperature (TEM): 0.0  
 Ion Source Gas 1 (GS1): 12.0  
 Ion Source Gas 2 (GS2): 0.0  
 Interface Heater (ihe): On  
  
 Declustering Potential (DP): 70.0  
 Entrance Potential (EP): 10.0  
  
 Q1 Resolution: Unit  
 Ion Energy 1 (IE1): 1.0  
  
 Deflector (DF): -200.0  
 CEM (CEM): 2500.0

# Mass Spectrometer Method Properties

Period 1:  
 -----  
 Scans in Period: 594  
 Relative Start Time: 0.00 msec  
 Experiments in Period: 1  
  
 Period 1 Experiment 1:  
 -----  
 Scan Type: Q1 MS (Q1)  
 Polarity: Positive  
 Scan Mode: Profile  
 Ion Source: Turbo Spray  
 Resolution Q1: Unit  
 Intensity Thres.: 0.00 cps  
 Settling Time: 0.0000 msec  
 MR Pause: 5.0070 msec  
 MCA: Yes  
 Center/Width: No  
 Step Size: 0.10 Da  
  

| Start (Da) | Stop (Da) | Time (sec) | Param | Start | Stop  |
|------------|-----------|------------|-------|-------|-------|
| 100.00     | 500.00    | 0.50       | CEP   | 7.84  | 19.33 |

  
 Parameter Table(Period 1 Experiment 1):  
 CUR: 10.00  
 IS: 5500.00  
 TEM: 0.00  
 GS1: 12.00  
 GS2: 0.00  
 ihe: ON  
 DP: 70.00  
 EP: 10.00

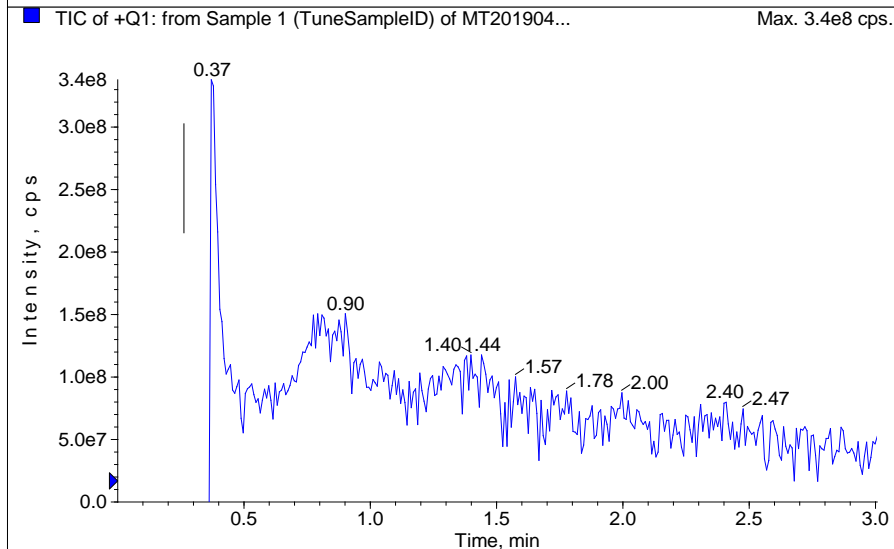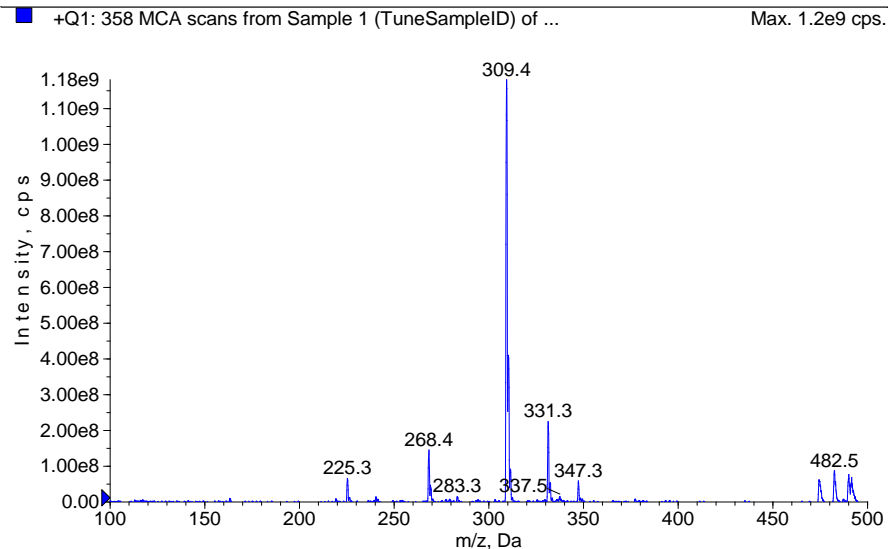

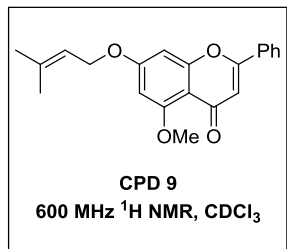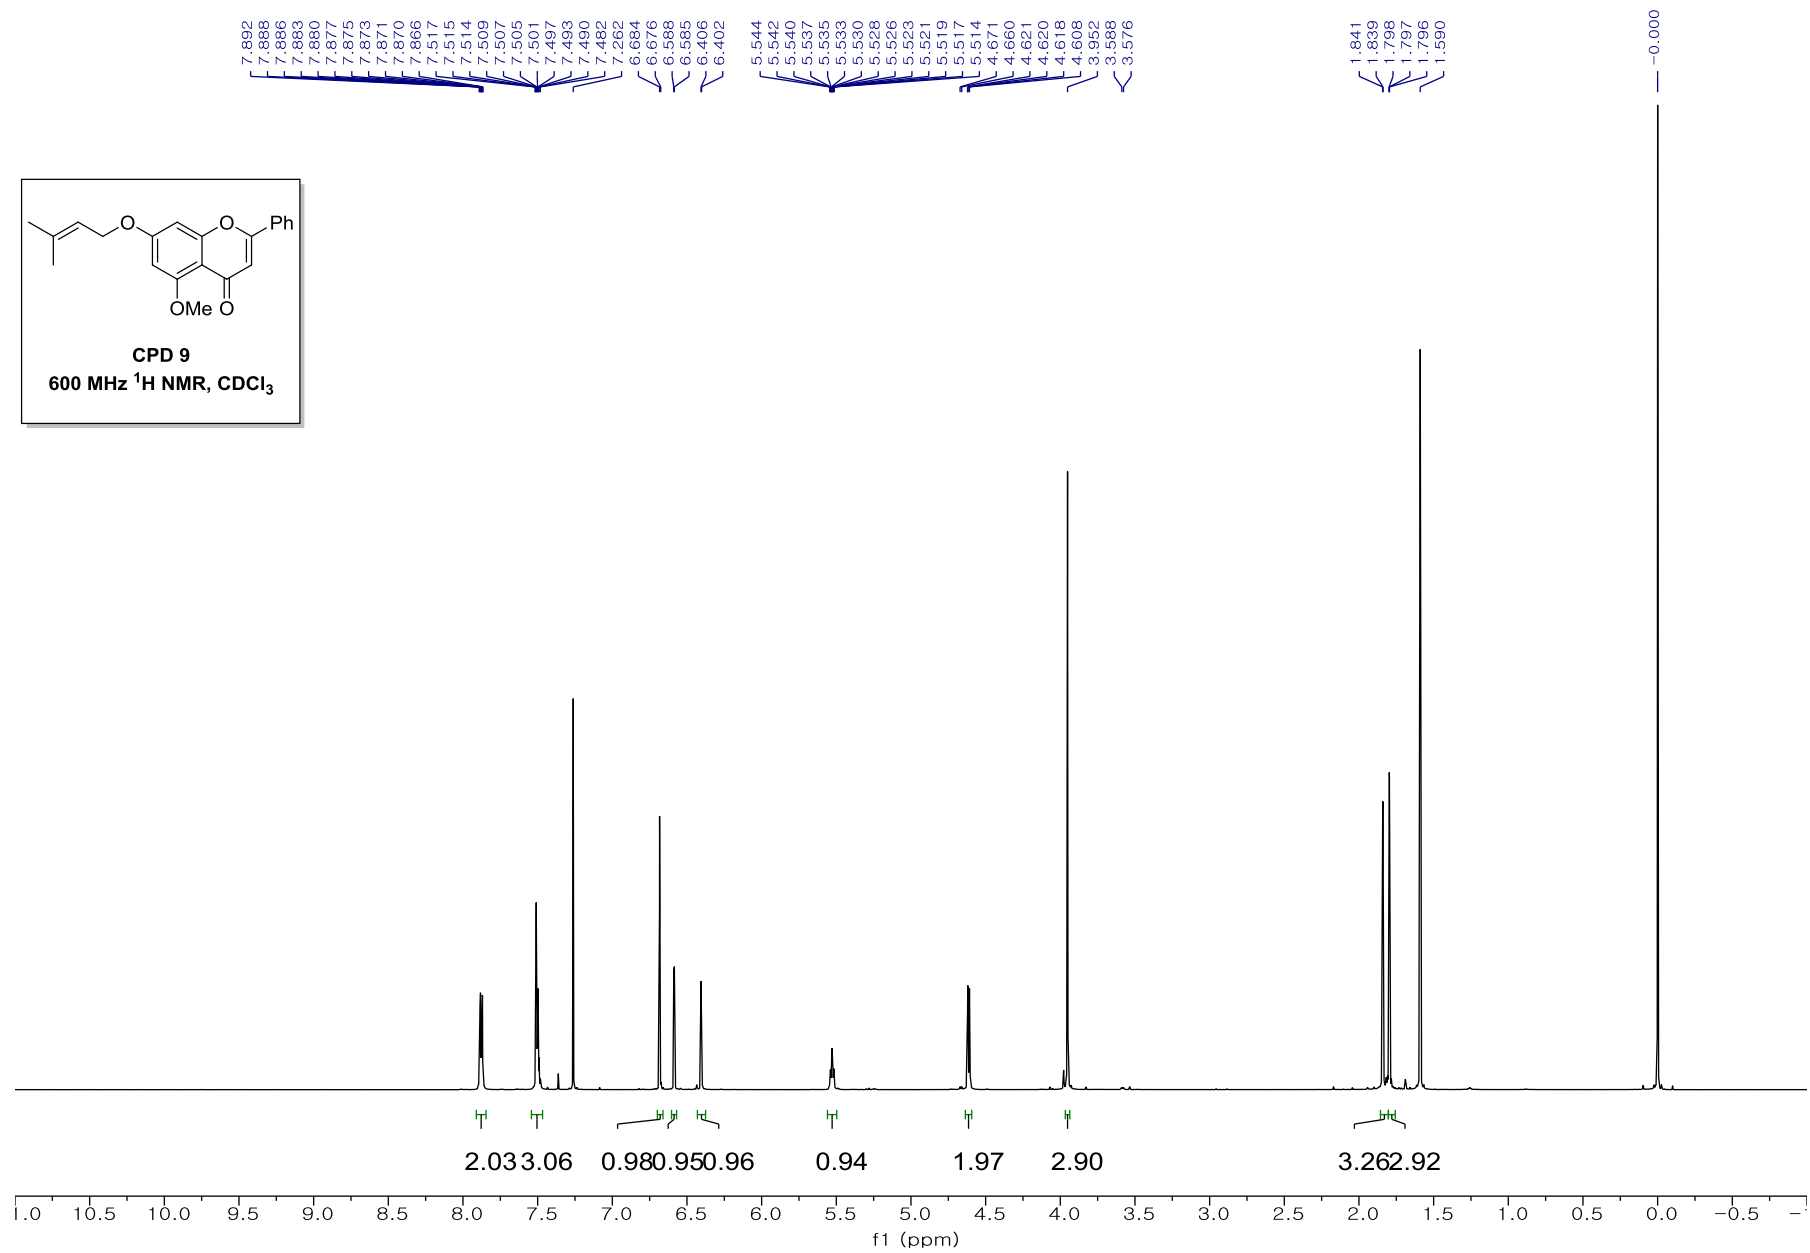



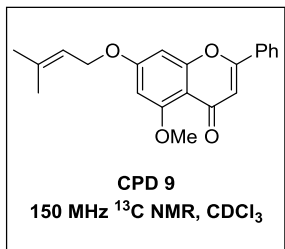

- 177.625
- 163.328
- 160.906
- 160.620
- 159.891
- 139.592
- 131.654
- 131.142
- 128.929
- 125.954
- 118.462
- 109.260
- 109.110
- 96.718
- 93.469
- 77.211
- 77.000
- 76.788
- 65.338
- 56.426
- 25.843
- 18.269
- 0.030

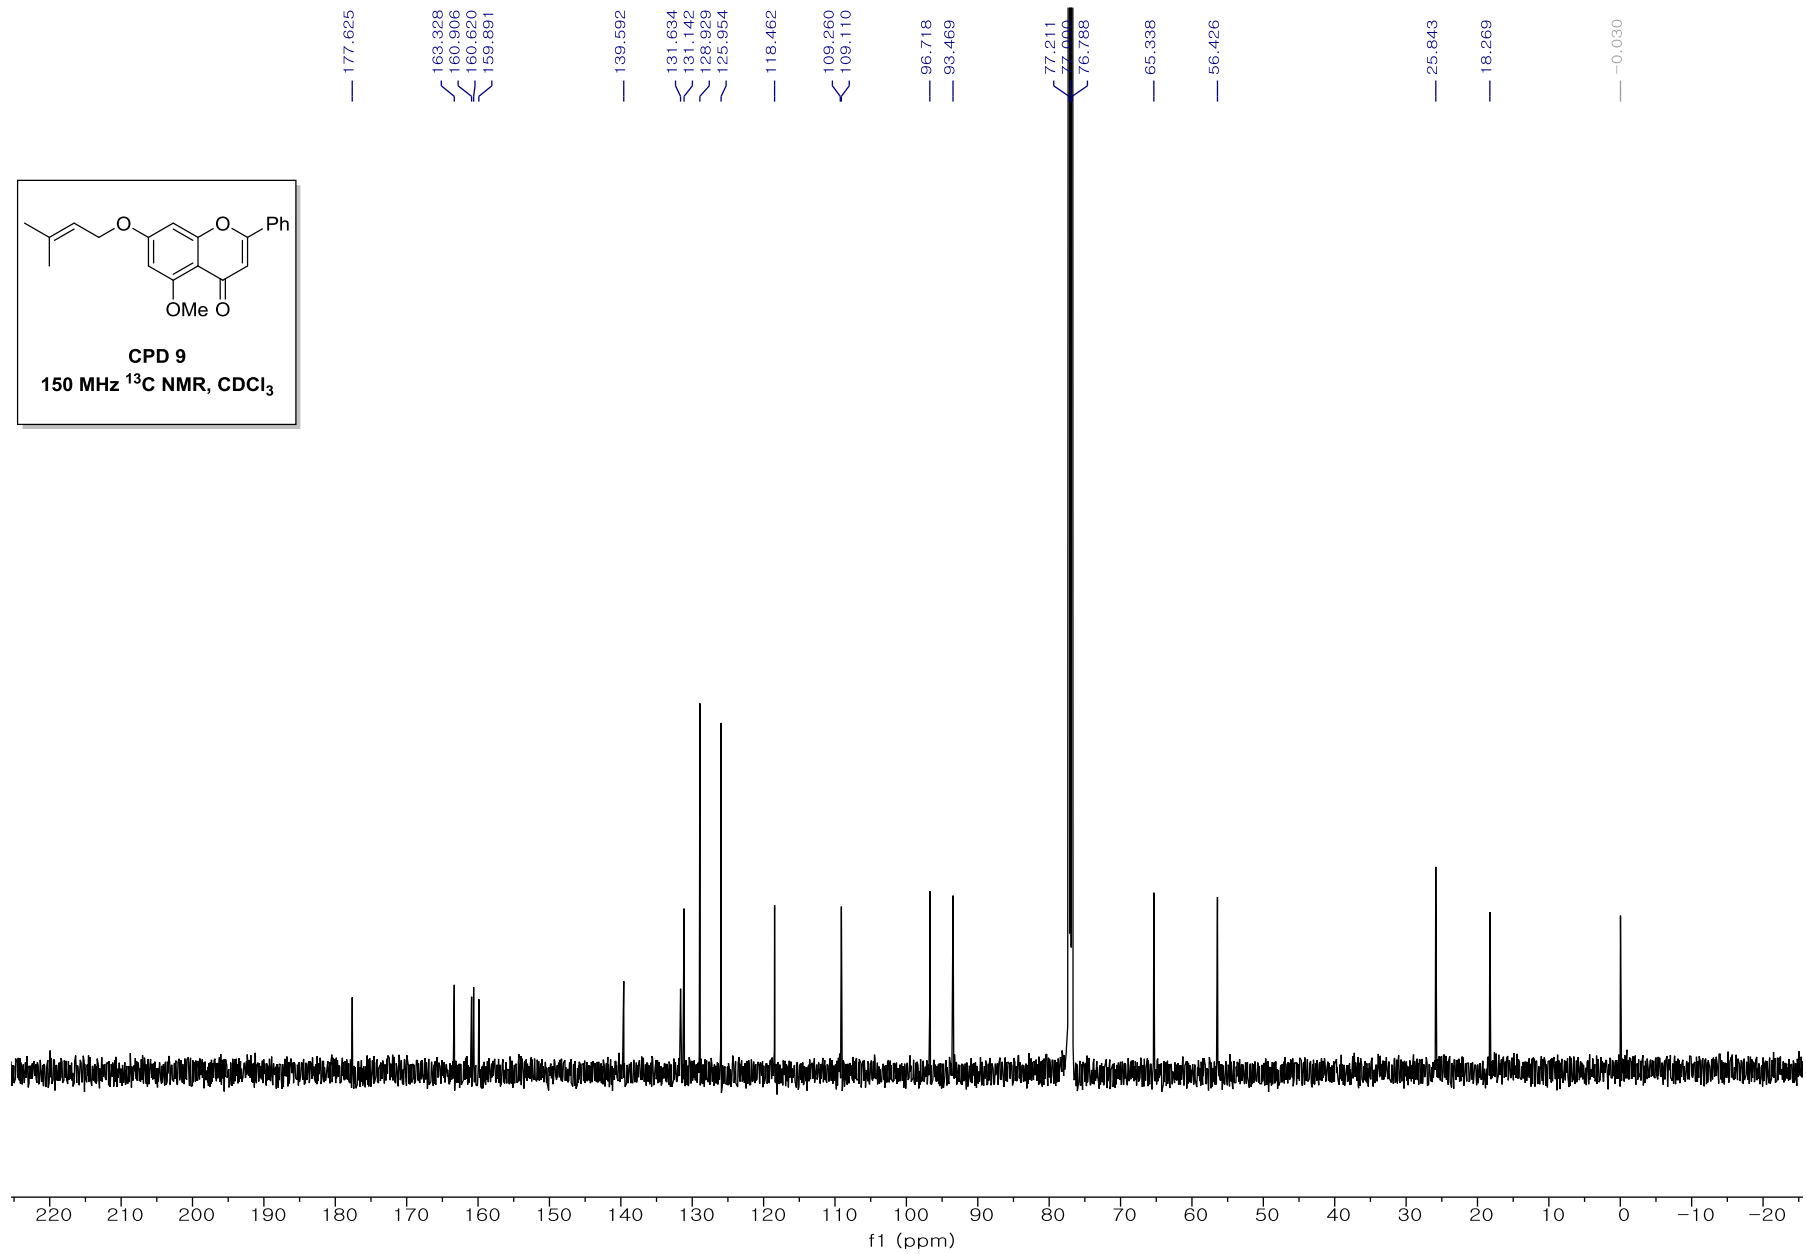

# State Parameter Editor

Ion Source: Turbo Spray  
 Ion Source Temperature Reached  
 Curtain Gas (CUR): 10.0  
 Ion Spray Voltage (IS): 5500.0  
 Temperature (TEM): 0.0  
 Ion Source Gas 1 (GS1): 12.0  
 Ion Source Gas 2 (GS2): 0.0  
 Interface Heater (ihe): On  
  
 Declustering Potential (DP): 70.0  
 Entrance Potential (EP): 10.0  
  
 Q1 Resolution: Unit  
 Ion Energy 1 (IE1): 1.0  
  
 Deflector (DF): -200.0  
 CEM (CEM): 2500.0

# Mass Spectrometer Method Properties

Period 1:  
 -----  
 Scans in Period: 356  
 Relative Start Time: 0.00 msec  
 Experiments in Period: 1  
  
 Period 1 Experiment 1:  
 -----  
 Scan Type: Q1 MS (Q1)  
 Polarity: Positive  
 Scan Mode: Profile  
 Ion Source: Turbo Spray  
 Resolution Q1: Unit  
 Intensity Thres.: 0.00 cps  
 Settling Time: 0.0000 msec  
 MR Pause: 5.0070 msec  
 MCA: Yes  
 Center/Width: No  
 Step Size: 0.10 Da  
  

| Start (Da) | Stop (Da) | Time (sec) | Param | Start | Stop  |
|------------|-----------|------------|-------|-------|-------|
| 100.00     | 500.00    | 0.50       | CEP   | 7.84  | 19.33 |

 Parameter Table(Period 1 Experiment 1):  
 CUR: 10.00  
 TEM: 0.00  
 GS1: 12.00  
 GS2: 0.00  
 ihe: ON  
 IS: 5500.00  
 DP: 70.00  
 EP: 10.00

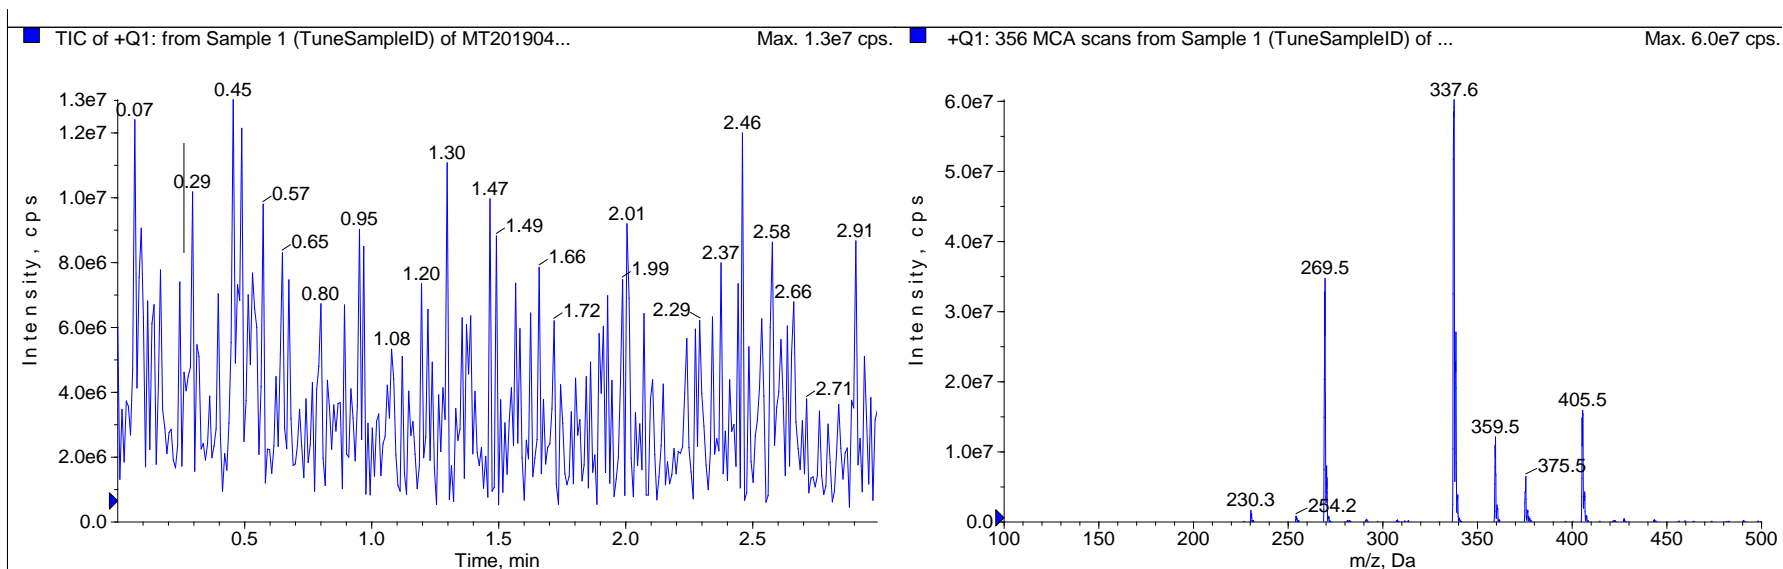

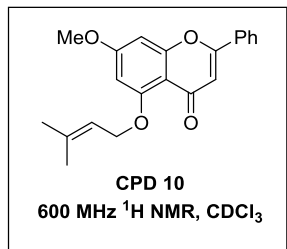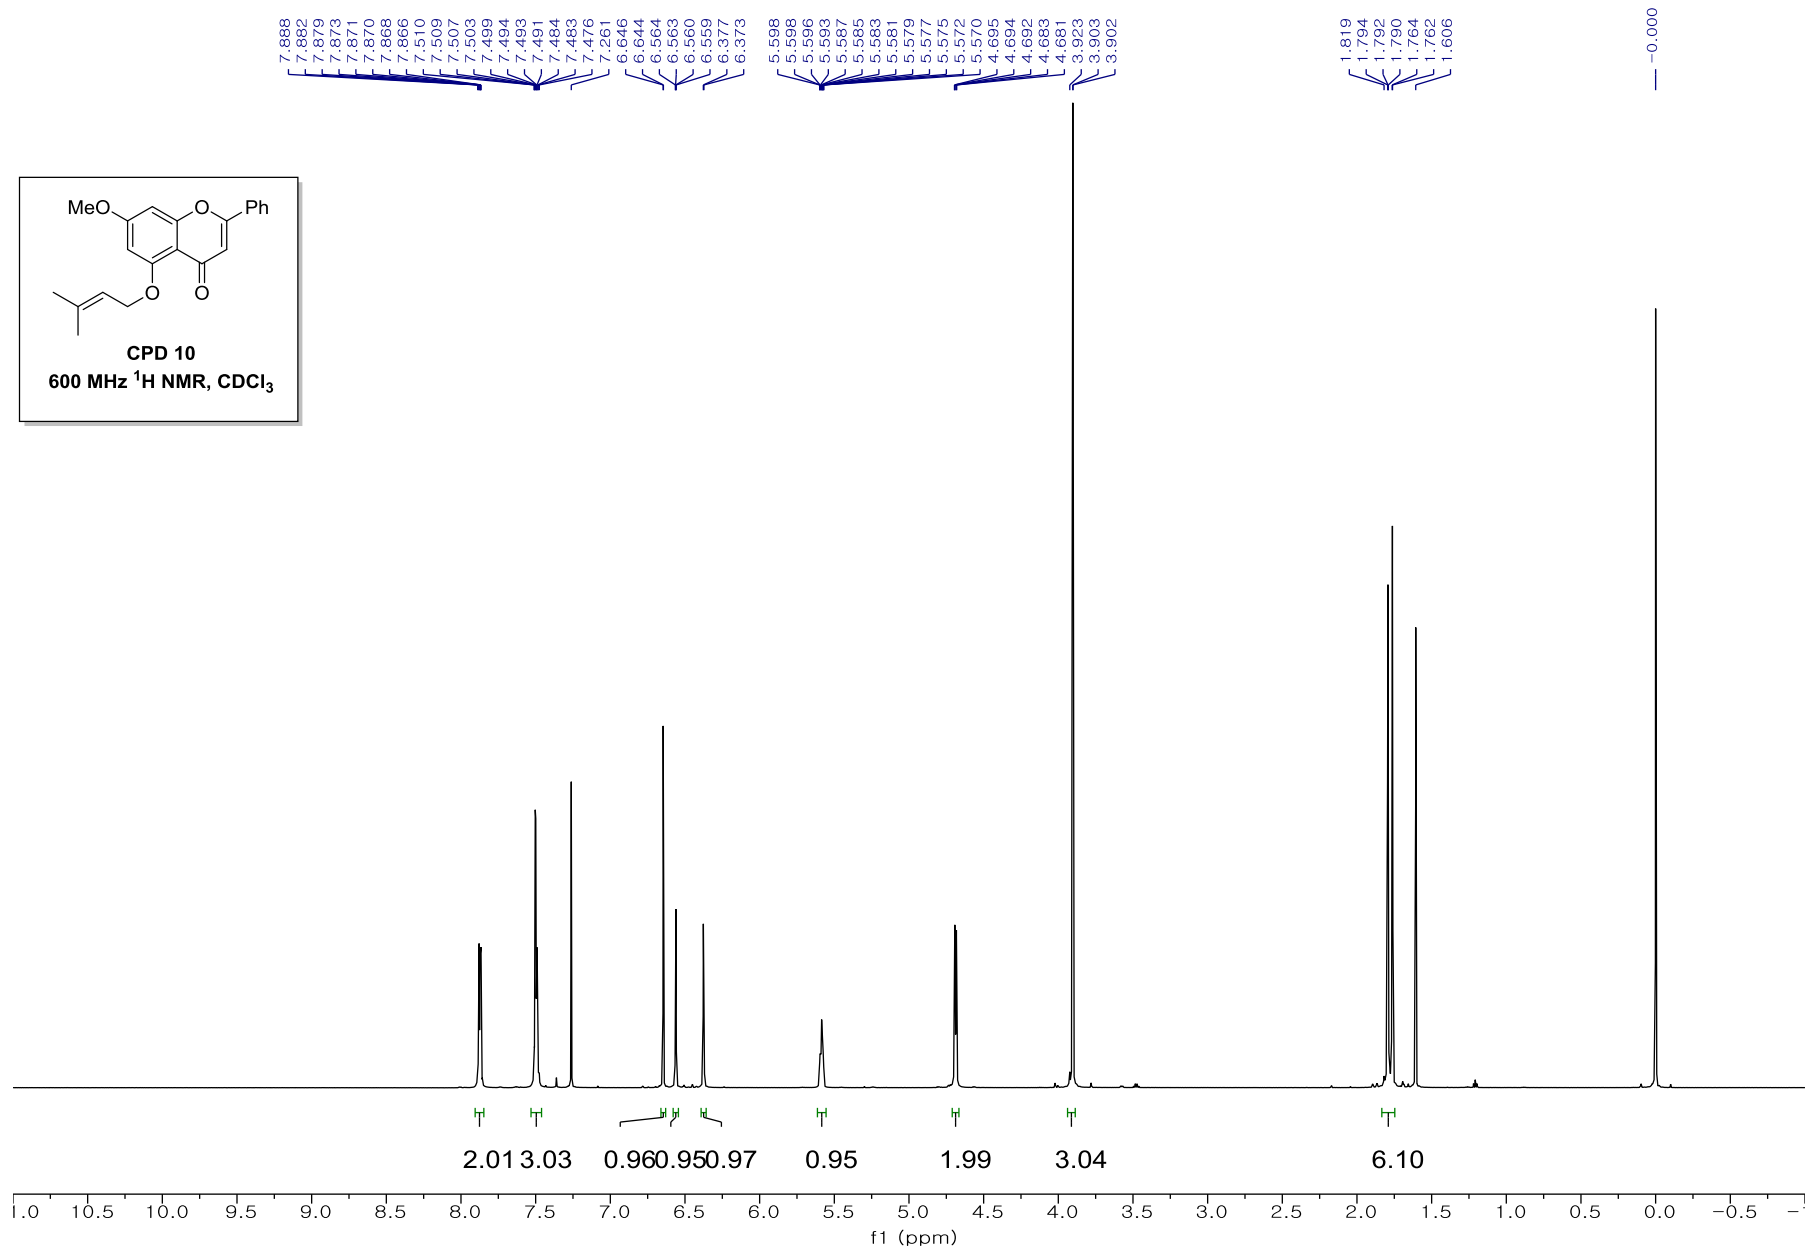

S11

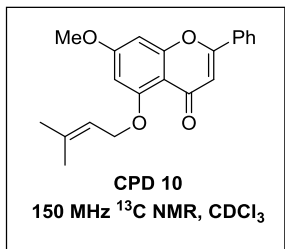

- 177.388
- 163.843
- 160.460
- 160.167
- 159.912
- 137.425
- 131.697
- 131.071
- 128.897
- 125.941
- 119.513
- 109.742
- 109.134
- 97.579
- 92.859
- 77.212
- 77.006
- 76.788
- 66.591
- 55.687
- 25.783
- 18.398
- 0.028

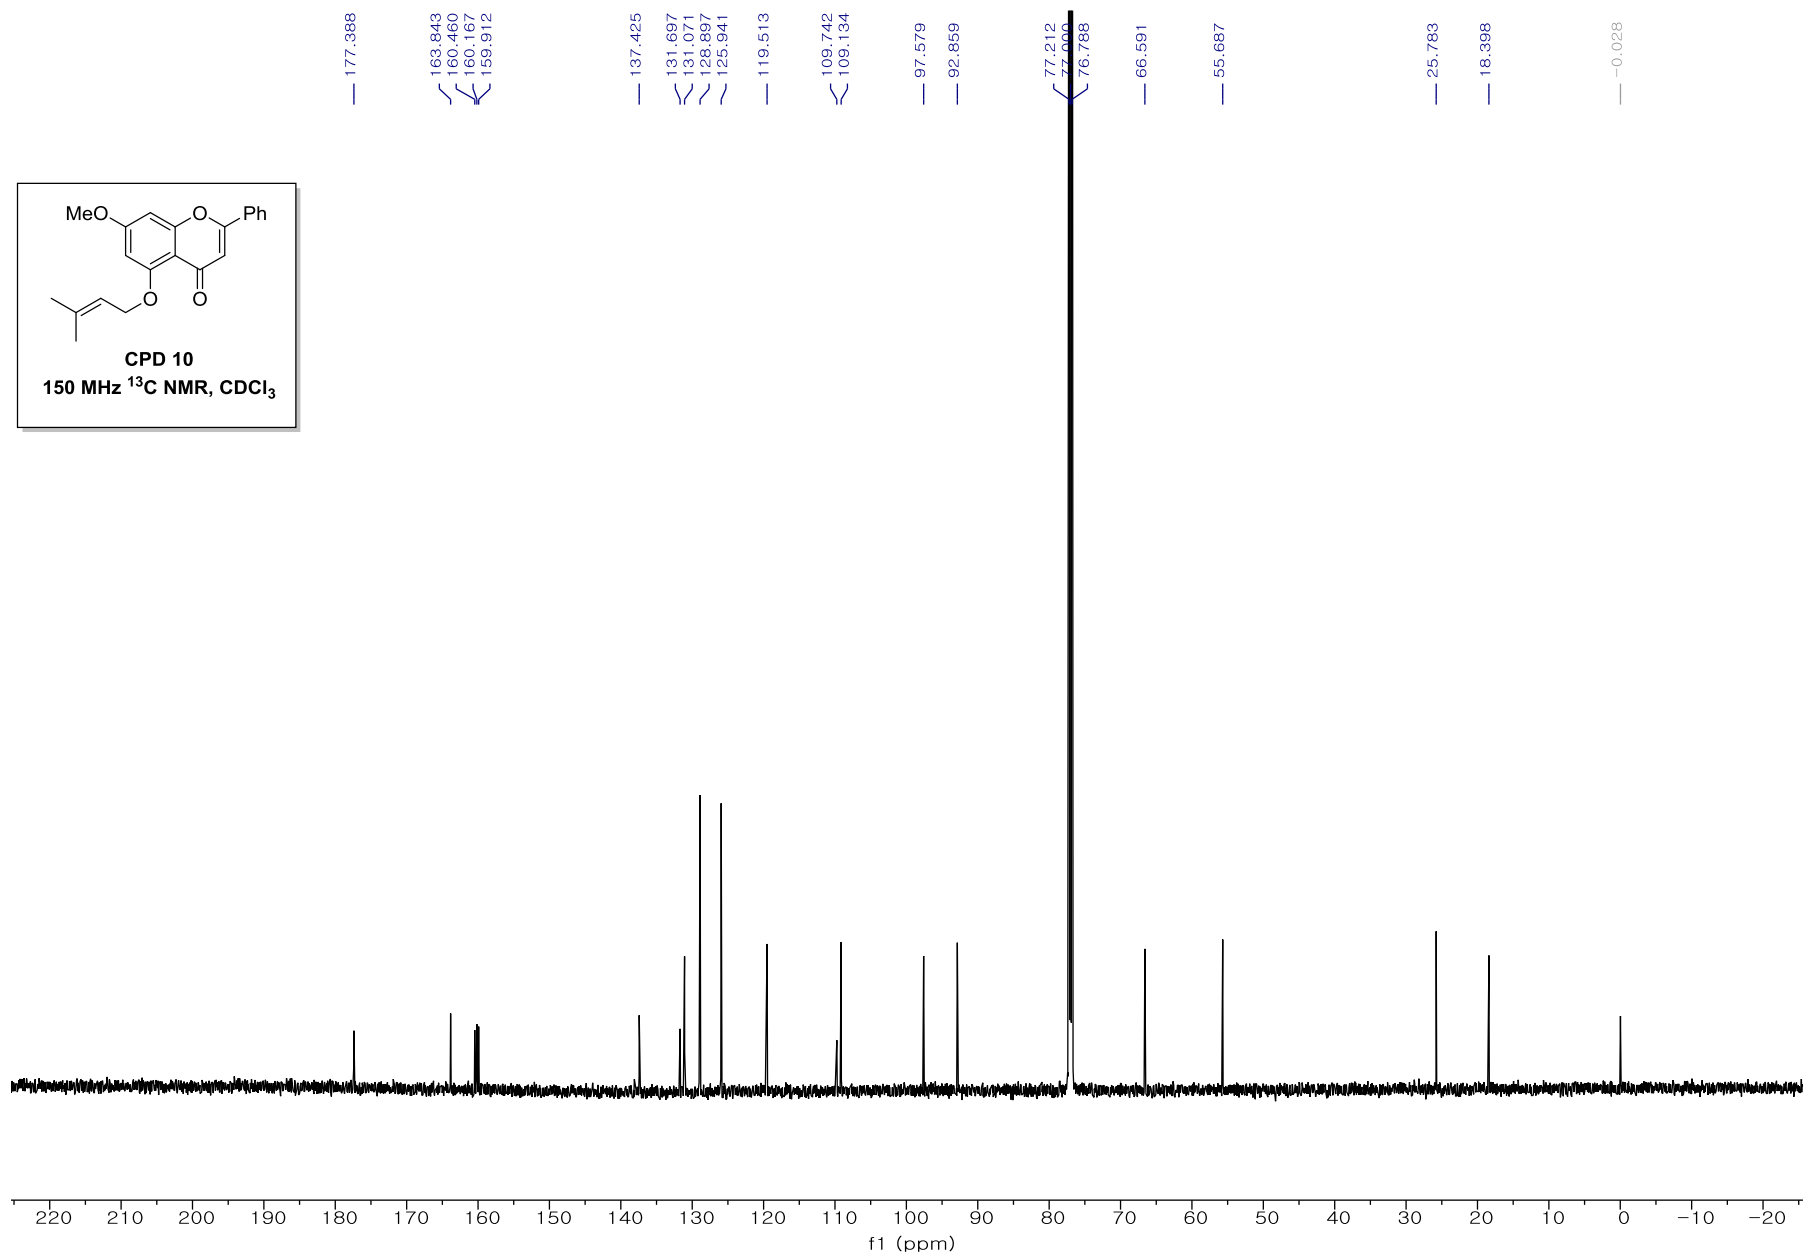

# State Parameter Editor

Ion Source: Turbo Spray  
 Ion Source Temperature Reached  
 Curtain Gas (CUR): 10.0  
 IonSpray Voltage (IS): 5500.0  
 Temperature (TEM): 0.0  
 Ion Source Gas 1 (GS1): 12.0  
 Ion Source Gas 2 (GS2): 0.0  
 Interface Heater (ihe): On  
  
 Declustering Potential (DP): 70.0  
 Entrance Potential (EP): 10.0  
  
 Q1 Resolution: Unit  
 Ion Energy 1 (IE1): 1.0  
  
 Deflector (DF): -200.0  
 CEM (CEM): 2500.0

# Mass Spectrometer Method Properties

Period 1:  
 -----  
 Scans in Period: 356  
 Relative Start Time: 0.00 msec  
 Experiments in Period: 1  
  
 Period 1 Experiment 1:  
 -----  
 Scan Type: Q1 MS (Q1)  
 Polarity: Positive  
 Scan Mode: Profile  
 Ion Source: Turbo Spray  
 Resolution Q1: Unit  
 Intensity Thres.: 0.00 cps  
 Settling Time: 0.0000 msec  
 MR Pause: 5.0070 msec  
 MCA: Yes  
 Center/Width: No  
 Step Size: 0.10 Da  
  

| Start (Da) | Stop (Da) | Time (sec) | Param | Start | Stop  |
|------------|-----------|------------|-------|-------|-------|
| 100.00     | 500.00    | 0.50       | CEP   | 7.84  | 19.33 |

 Parameter Table(Period 1 Experiment 1):  
 CUR: 10.00  
 TEM: 0.00  
 GS1: 12.00  
 GS2: 0.00  
 ihe: ON  
 IS: 5500.00  
 DP: 70.00  
 EP: 10.00

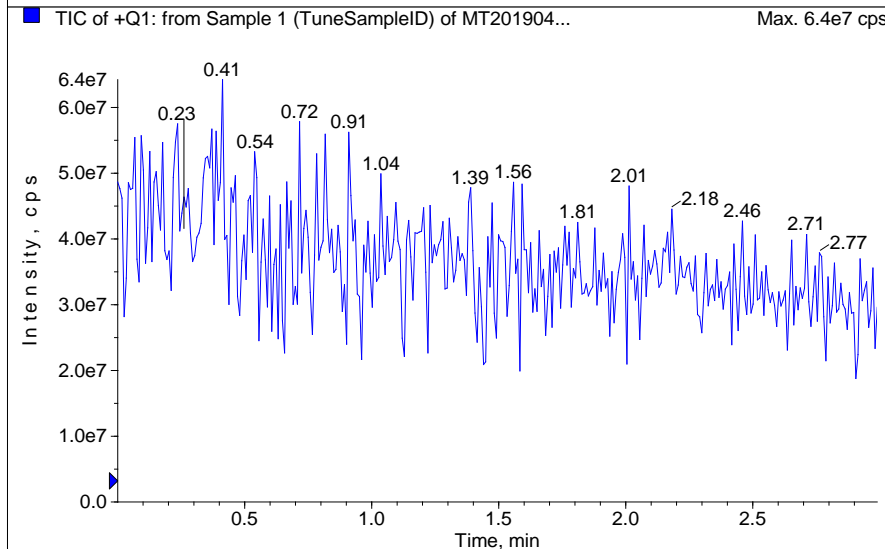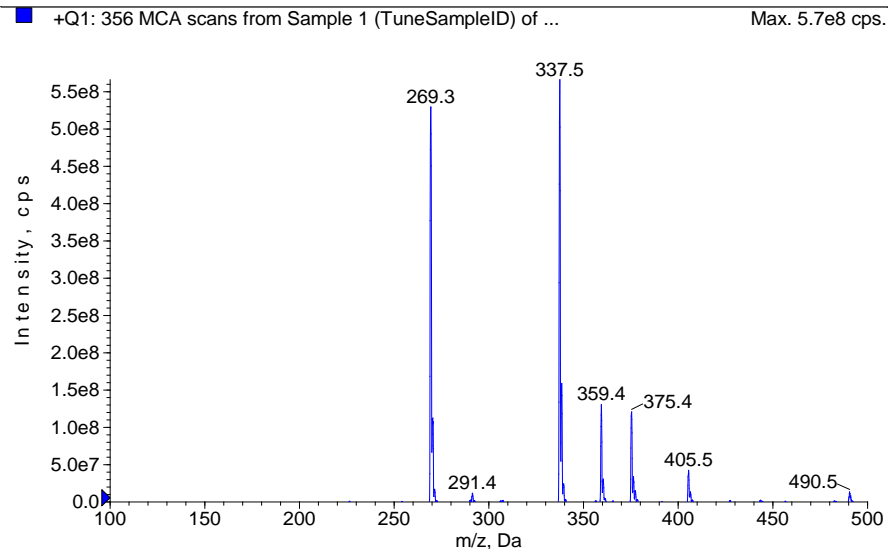

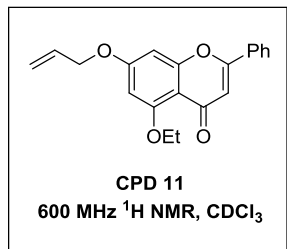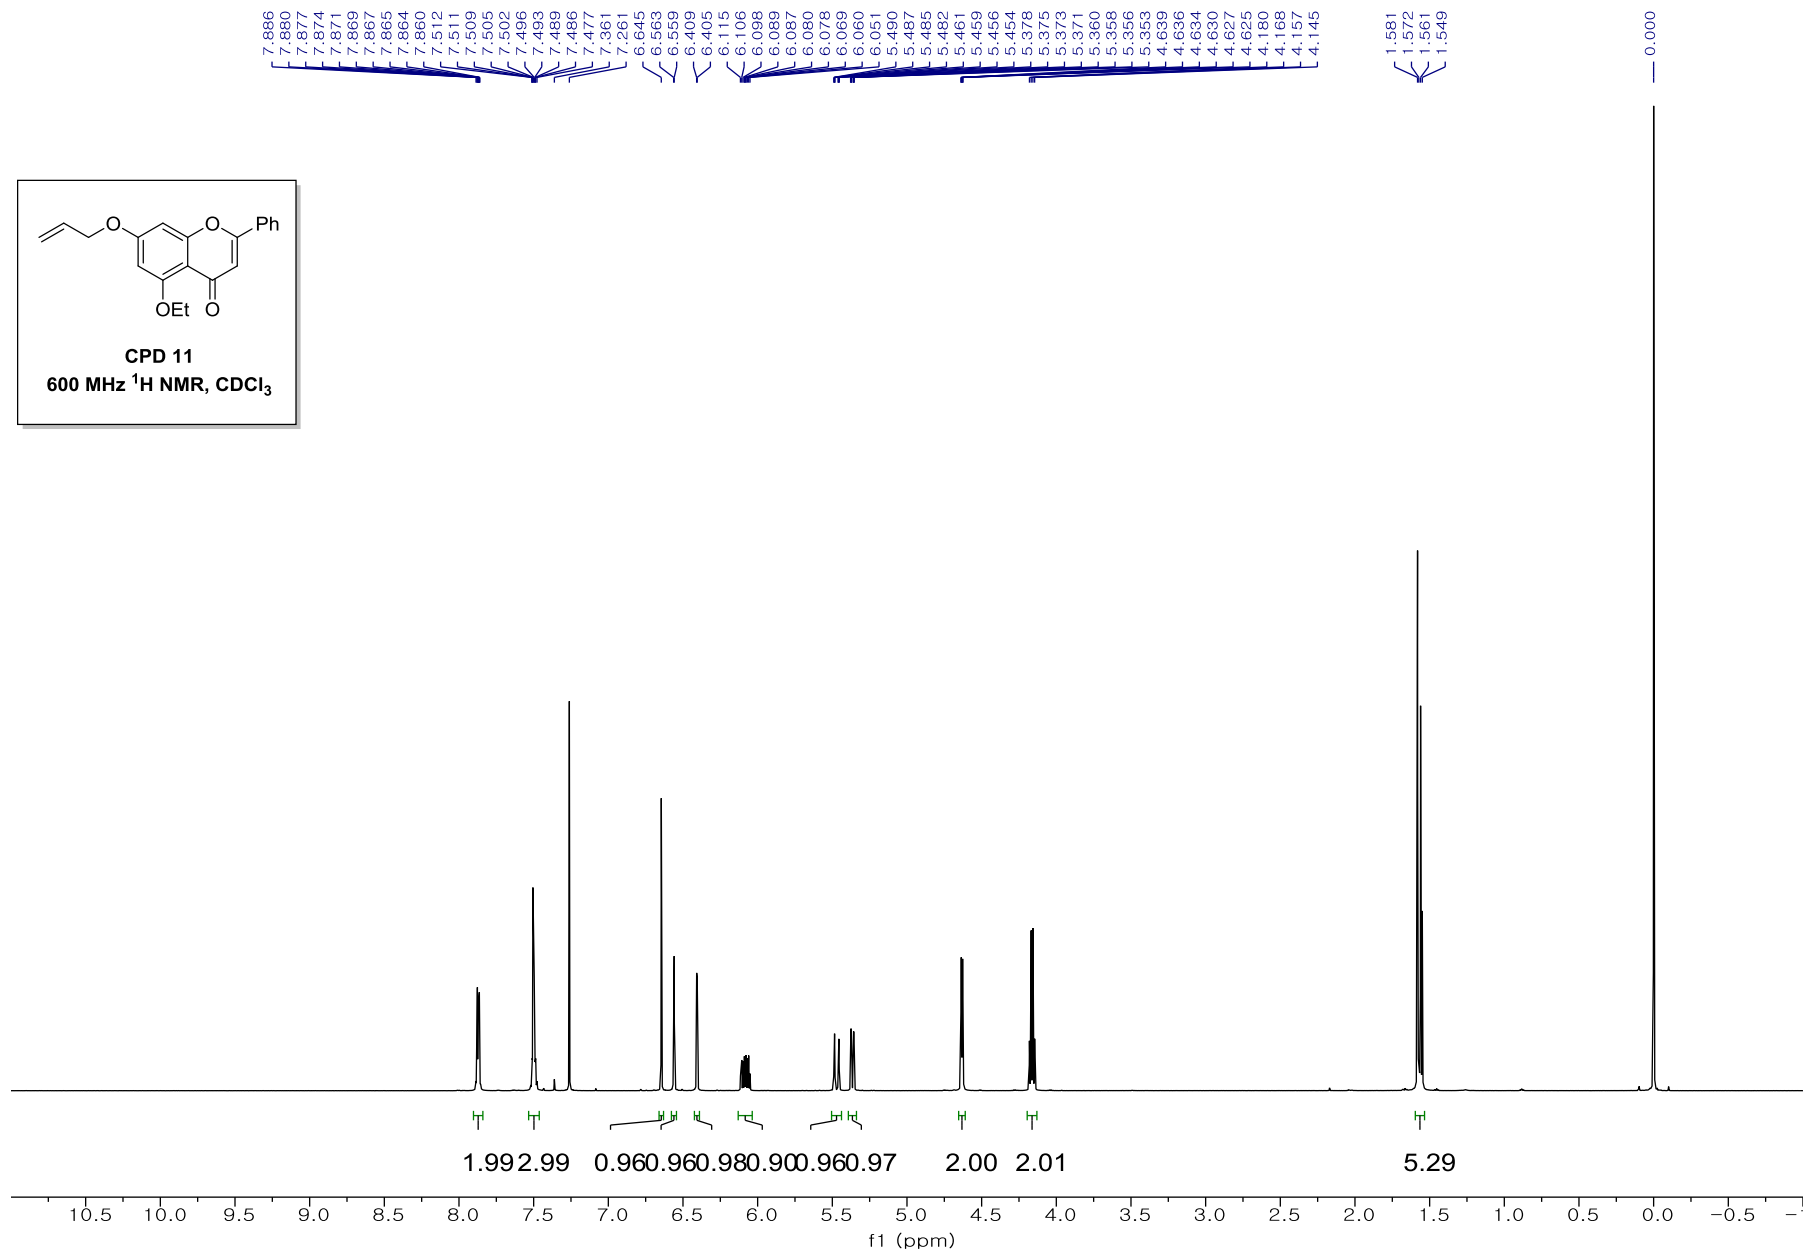

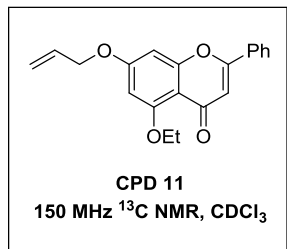

- 177.488
- 162.871
- 160.525
- 160.310
- 159.825
- 132.163
- 131.675
- 131.098
- 128.902
- 125.958
- 118.535
- 109.646
- 109.135
- 97.540
- 93.601
- 77.212
- 77.006
- 76.788
- 69.199
- 65.049
- 14.485
- 0.024

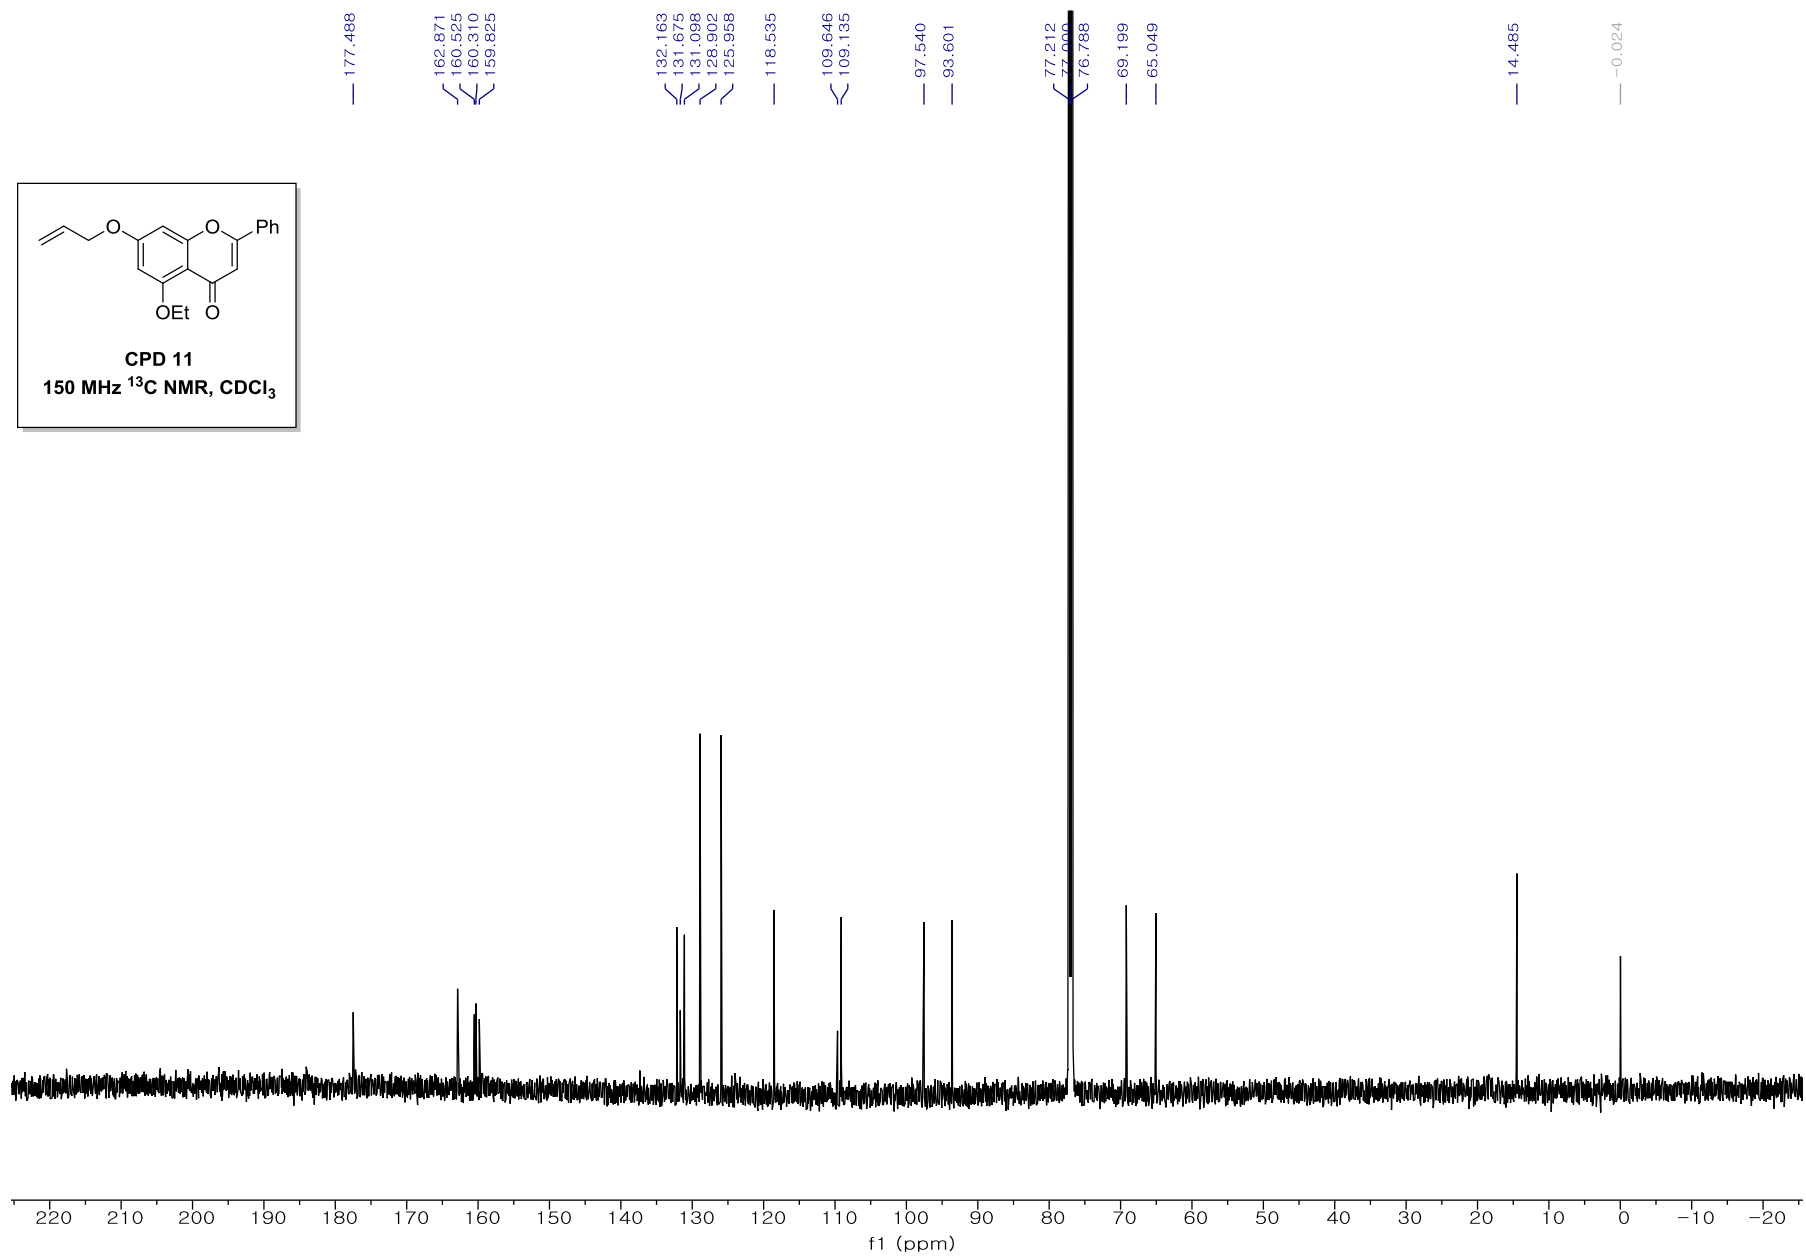

# State Parameter Editor

Ion Source: Turbo Spray  
 Ion Source Temperature Reached  
 Curtain Gas (CUR): 10.0  
 Ion Spray Voltage (IS): 5500.0  
 Temperature (TEM): 0.0  
 Ion Source Gas 1 (GS1): 12.0  
 Ion Source Gas 2 (GS2): 0.0  
 Interface Heater (ihe): On  
  
 Declustering Potential (DP): 70.0  
 Entrance Potential (EP): 10.0  
  
 Q1 Resolution: Unit  
 Ion Energy 1 (IE1): 1.0  
  
 Deflector (DF): -200.0  
 CEM (CEM): 2500.0

# Mass Spectrometer Method Properties

Period 1:  
 -----  
 Scans in Period: 356  
 Relative Start Time: 0.00 msec  
 Experiments in Period: 1  
  
 Period 1 Experiment 1:  
 -----  
 Scan Type: Q1 MS (Q1)  
 Polarity: Positive  
 Scan Mode: Profile  
 Ion Source: Turbo Spray  
 Resolution Q1: Unit  
 Intensity Thres.: 0.00 cps  
 Settling Time: 0.0000 msec  
 MR Pause: 5.0070 msec  
 MCA: Yes  
 Center/Width: No  
 Step Size: 0.10 Da  
  

| Start (Da) | Stop (Da) | Time (sec) | Param | Start | Stop  |
|------------|-----------|------------|-------|-------|-------|
| 100.00     | 500.00    | 0.50       | CEP   | 7.84  | 19.33 |

  
 Parameter Table(Period 1 Experiment 1):  
 CUR: 10.00  
 TEM: 0.00  
 GS1: 12.00  
 GS2: 0.00  
 ihe: ON  
 IS: 5500.00  
 DP: 70.00  
 EP: 10.00

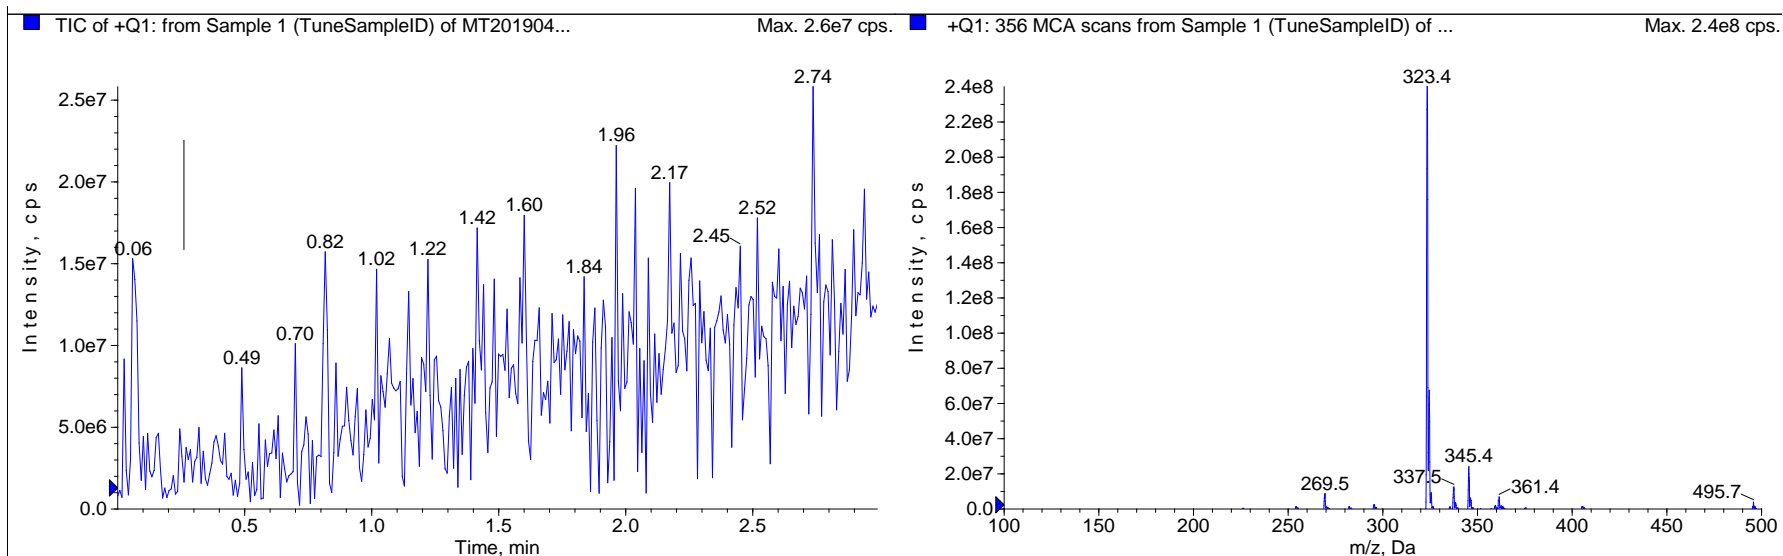



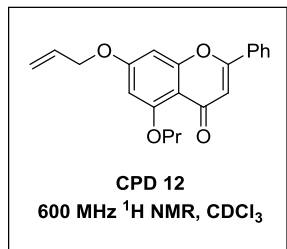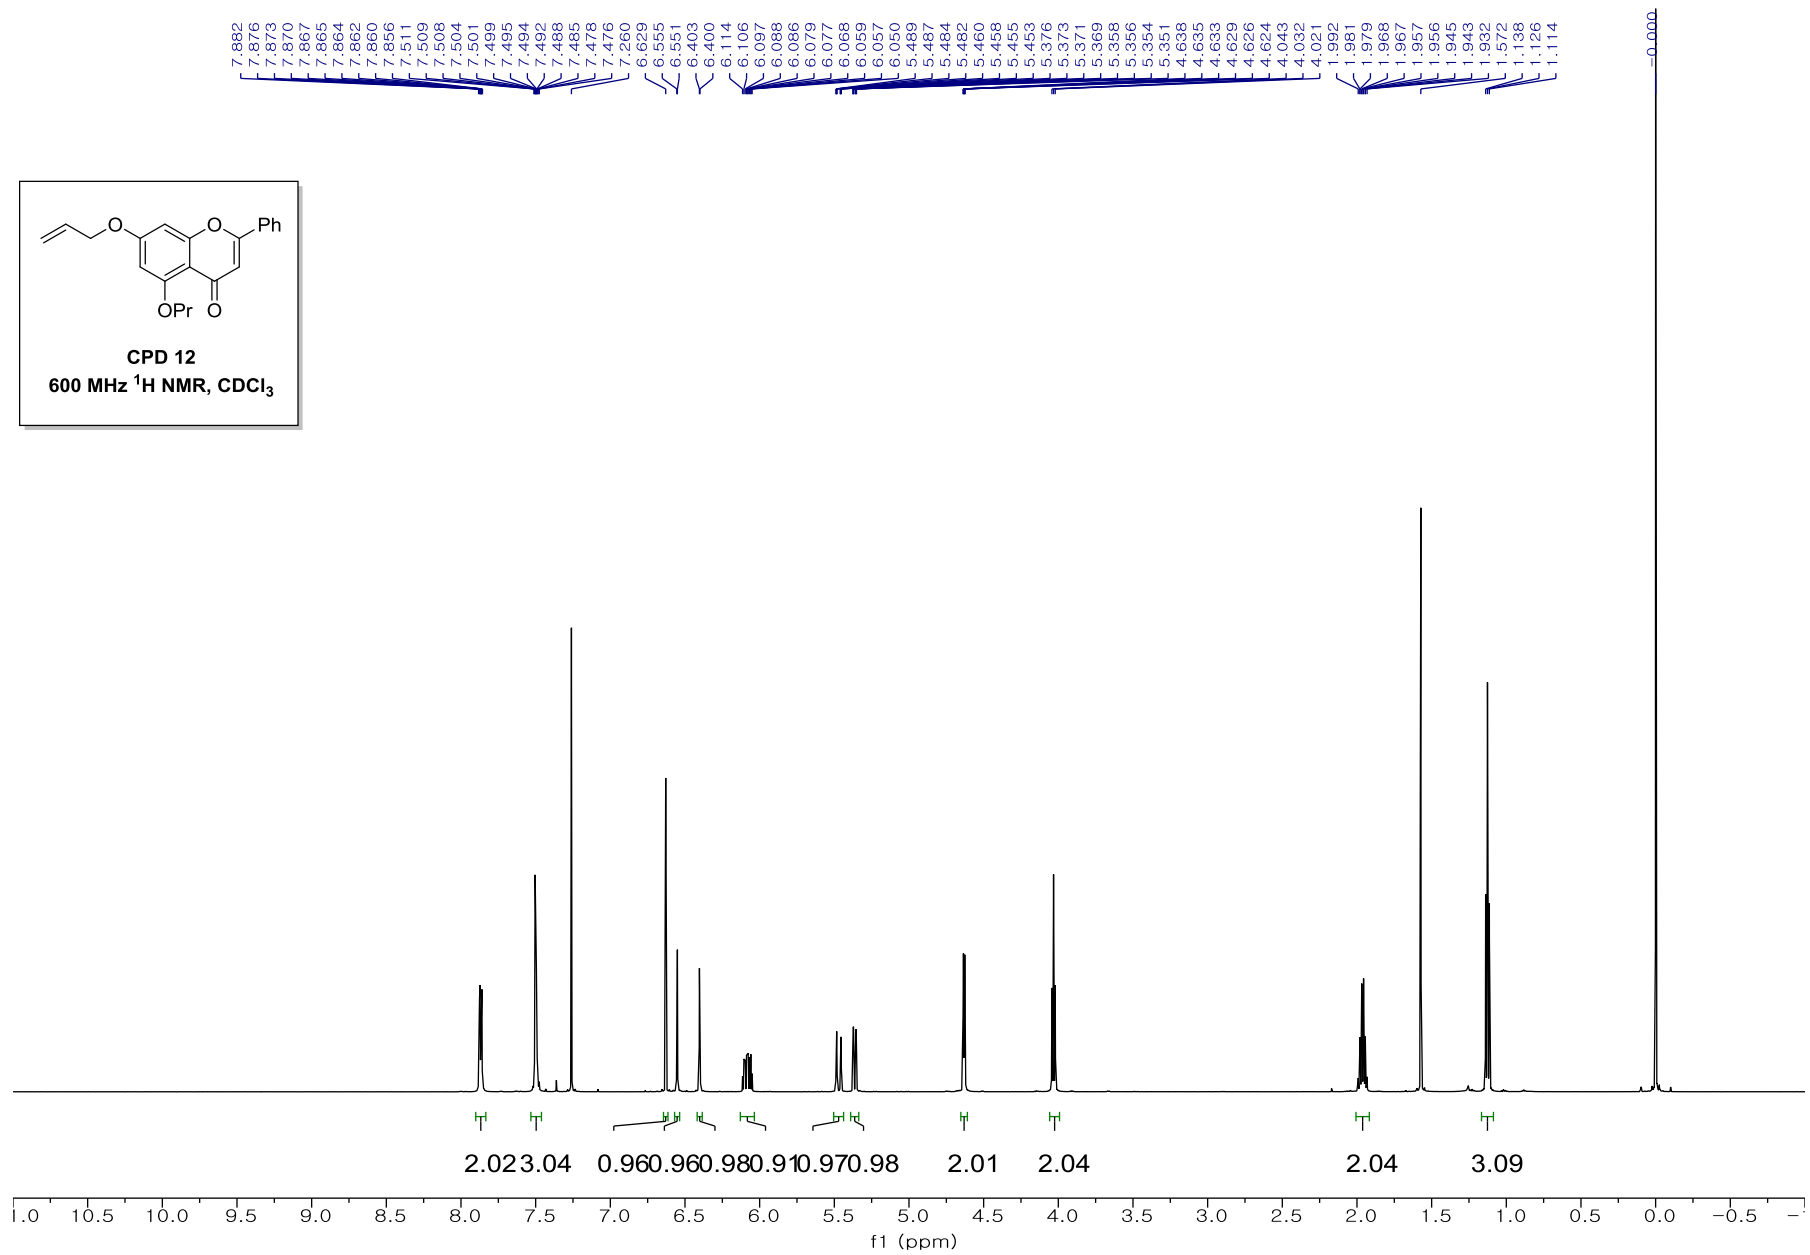

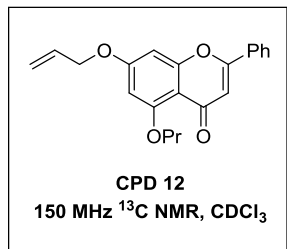

- 177.403
- 162.867
- 160.540
- 160.485
- 159.804
- 132.187
- 131.718
- 131.073
- 128.901
- 125.958
- 118.508
- 109.681
- 109.171
- 97.447
- 93.521
- 77.212
- 77.006
- 76.788
- 70.904
- 69.184
- 22.293
- 10.469
- 0.027

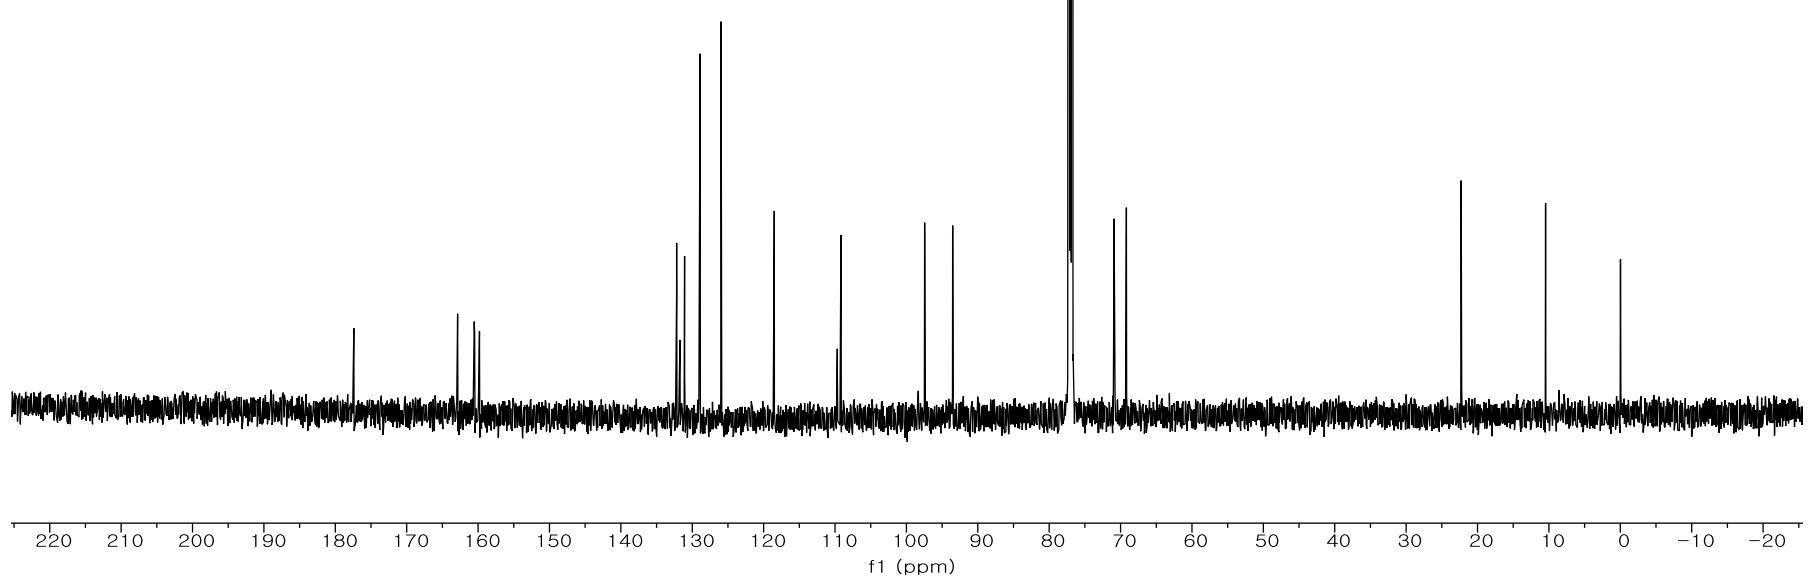

# State Parameter Editor

Ion Source: Turbo Spray  
 Ion Source Temperature Reached  
 Curtain Gas (CUR): 10.0  
 Ion Spray Voltage (IS): 5500.0  
 Temperature (TEM): 0.0  
 Ion Source Gas 1 (GS1): 12.0  
 Ion Source Gas 2 (GS2): 0.0  
 Interface Heater (ihe): On  
  
 Declustering Potential (DP): 70.0  
 Entrance Potential (EP): 10.0  
  
 Q1 Resolution: Unit  
 Ion Energy 1 (IE1): 1.0  
  
 Deflector (DF): -200.0  
 CEM (CEM): 2500.0

# Mass Spectrometer Method Properties

Period 1:  
 -----  
 Scans in Period: 356  
 Relative Start Time: 0.00 msec  
 Experiments in Period: 1  
  
 Period 1 Experiment 1:  
 -----  
 Scan Type: Q1 MS (Q1)  
 Polarity: Positive  
 Scan Mode: Profile  
 Ion Source: Turbo Spray  
 Resolution Q1: Unit  
 Intensity Thres.: 0.00 cps  
 Settling Time: 0.0000 msec  
 MR Pause: 5.0070 msec  
 MCA: Yes  
 Center/Width: No  
 Step Size: 0.10 Da  
  

| Start (Da) | Stop (Da) | Time (sec) | Param | Start | Stop  |
|------------|-----------|------------|-------|-------|-------|
| 100.00     | 500.00    | 0.50       | CEP   | 7.84  | 19.33 |

  
 Parameter Table(Period 1 Experiment 1):  
 CUR: 10.00  
 TEM: 0.00  
 GS1: 12.00  
 GS2: 0.00  
 ihe: ON  
 IS: 5500.00  
 DP: 70.00  
 EP: 10.00

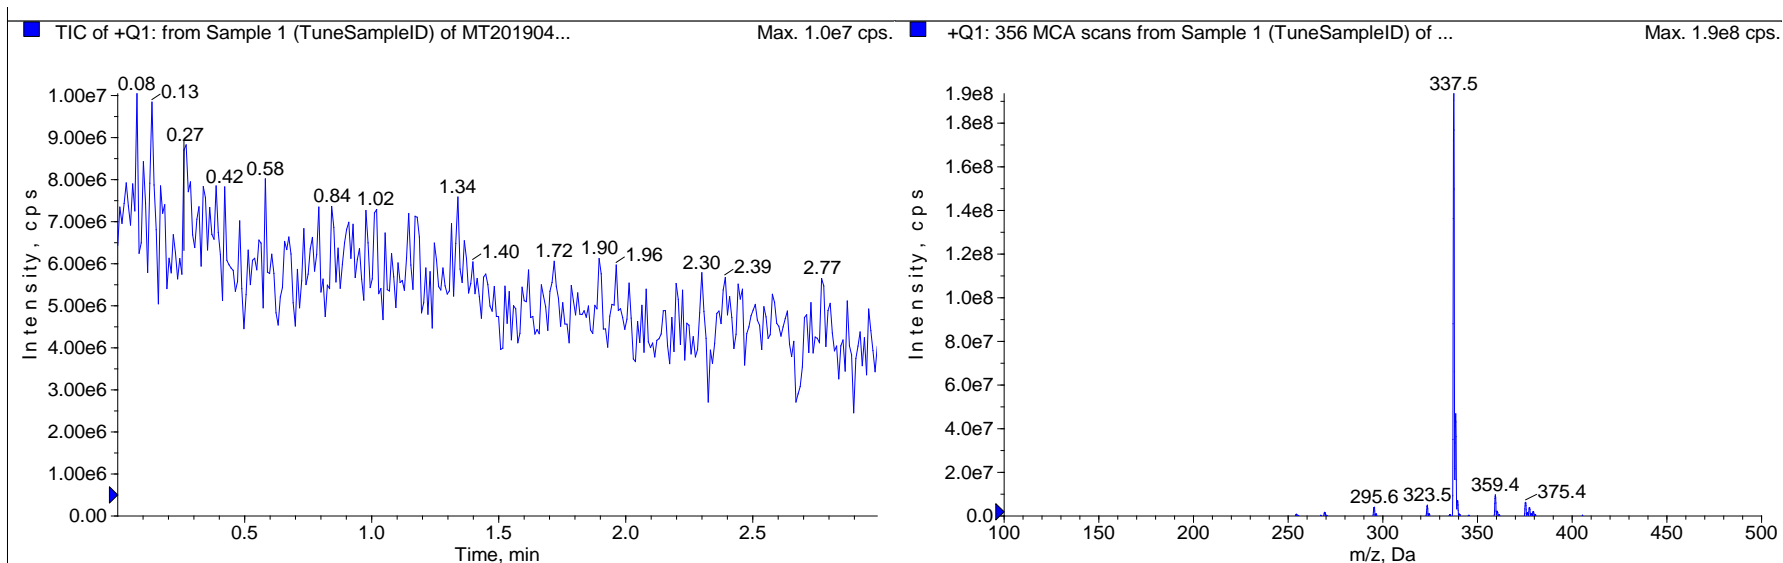

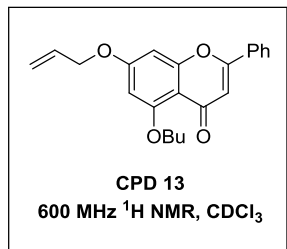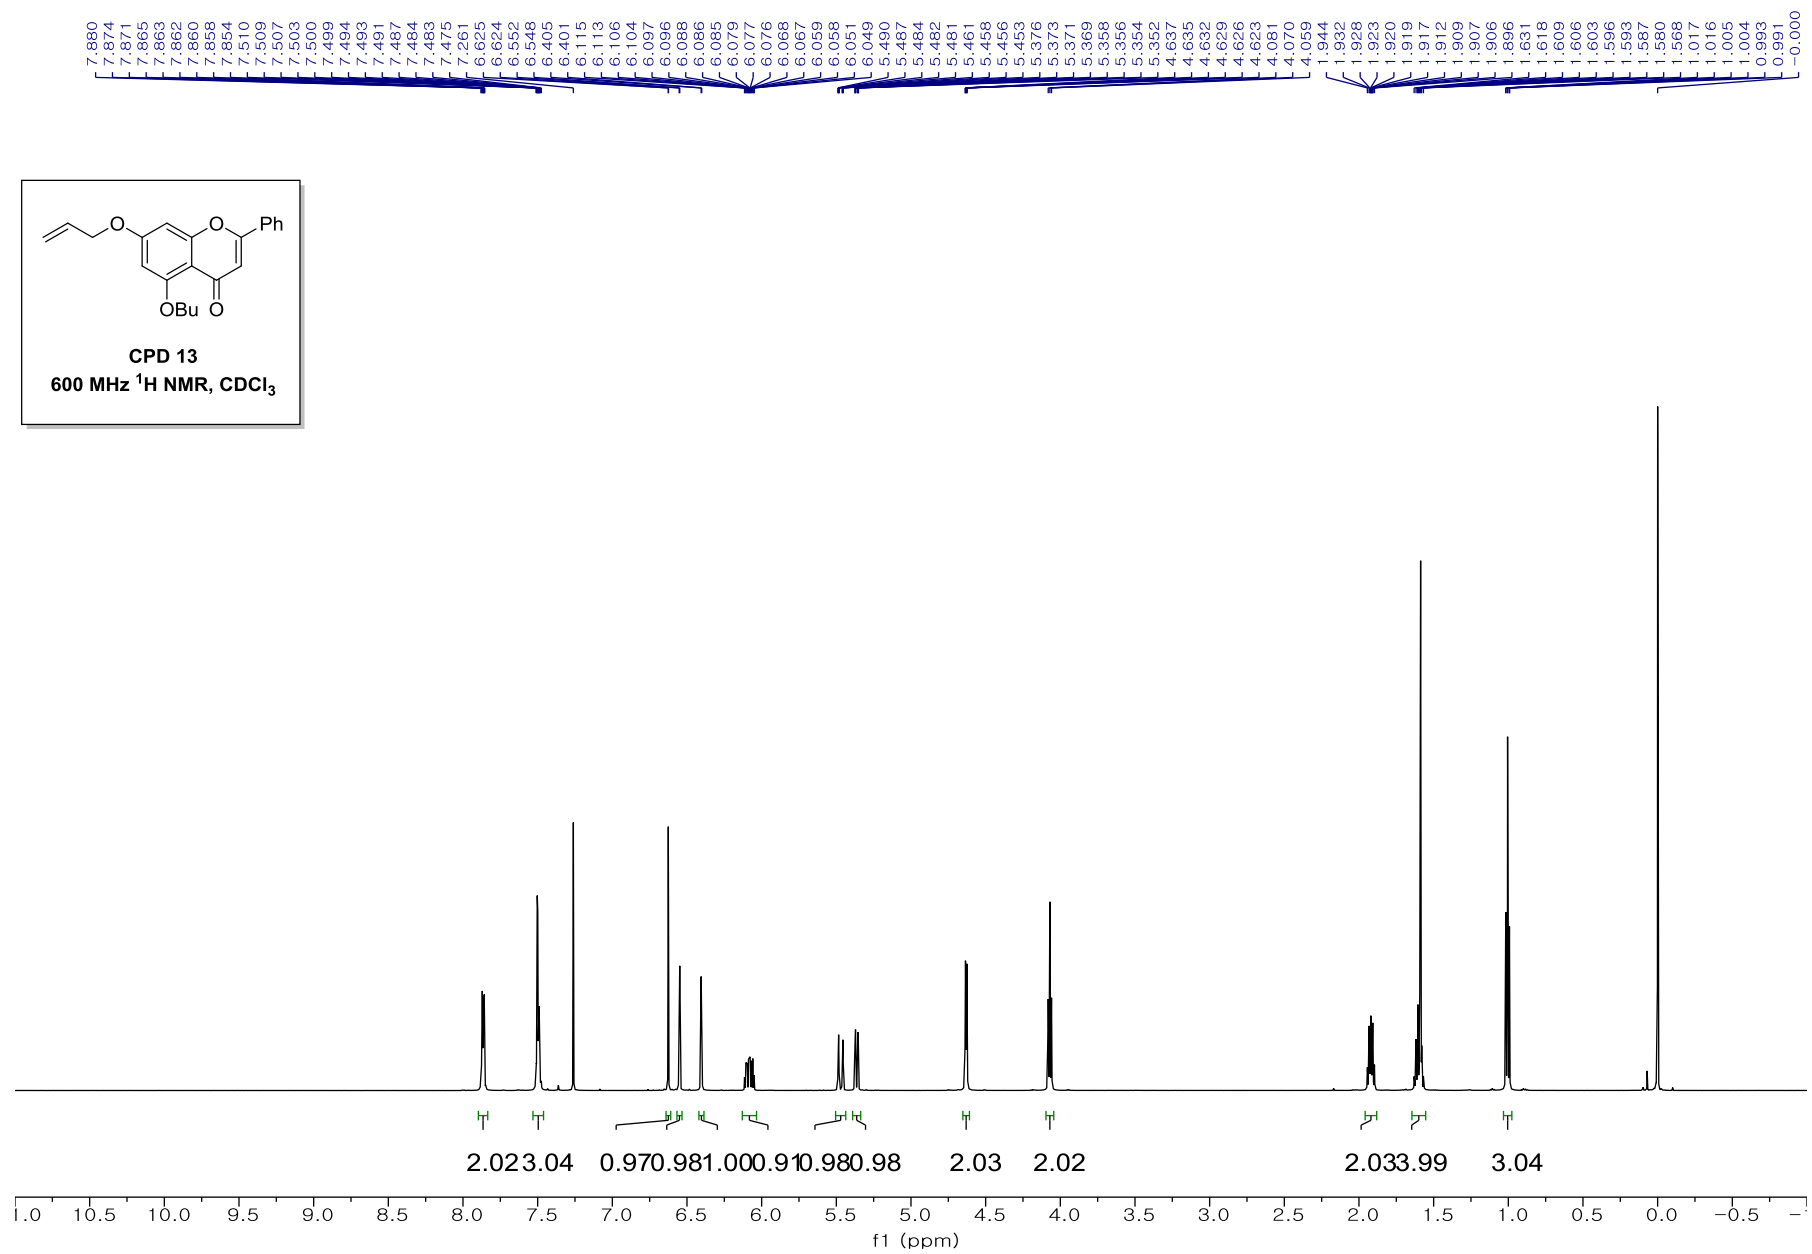

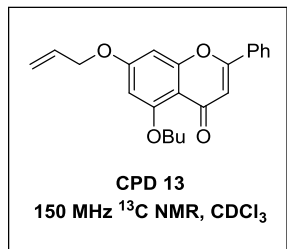

- 177.394
- 162.865
- 160.557
- 160.486
- 159.803
- 132.185
- 131.716
- 131.070
- 128.896
- 125.956
- 118.510
- 109.664
- 109.163
- 97.419
- 93.490
- 77.211
- 77.000
- 76.788
- 69.181
- 30.937
- 19.202
- 13.849
- 0.030

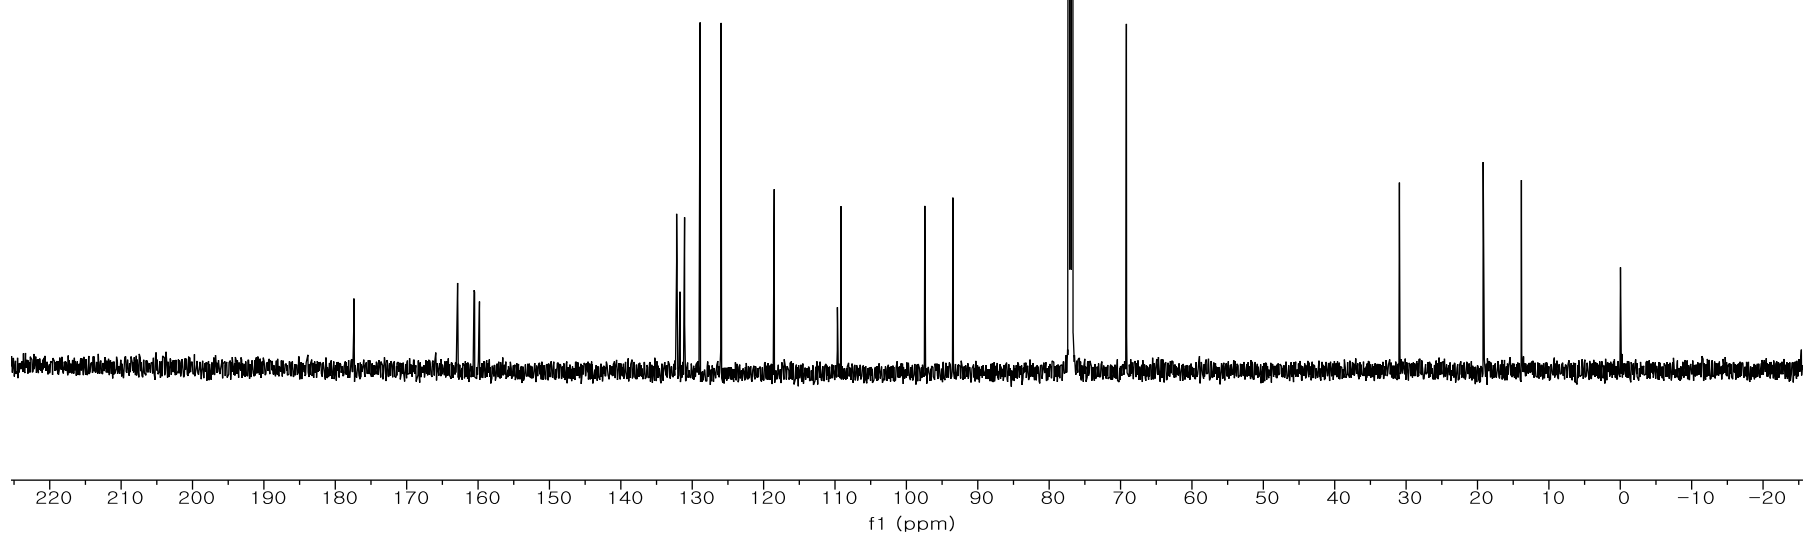

# State Parameter Editor

Ion Source: Turbo Spray  
 Ion Source Temperature Reached  
 Curtain Gas (CUR): 10.0  
 Ion Spray Voltage (IS): 5500.0  
 Temperature (TEM): 0.0  
 Ion Source Gas 1 (GS1): 12.0  
 Ion Source Gas 2 (GS2): 0.0  
 Interface Heater (ihe): On  
  
 Declustering Potential (DP): 70.0  
 Entrance Potential (EP): 10.0  
  
 Q1 Resolution: Unit  
 Ion Energy 1 (IE1): 1.0  
  
 Deflector (DF): -200.0  
 CEM (CEM): 2500.0

# Mass Spectrometer Method Properties

Period 1:  
 -----  
 Scans in Period: 356  
 Relative Start Time: 0.00 msec  
 Experiments in Period: 1  
  
 Period 1 Experiment 1:  
 -----  
 Scan Type: Q1 MS (Q1)  
 Polarity: Positive  
 Scan Mode: Profile  
 Ion Source: Turbo Spray  
 Resolution Q1: Unit  
 Intensity Thres.: 0.00 cps  
 Settling Time: 0.0000 msec  
 MR Pause: 5.0070 msec  
 MCA: Yes  
 Center/Width: No  
 Step Size: 0.10 Da  
  

| Start (Da) | Stop (Da) | Time (sec) | Param | Start | Stop  |
|------------|-----------|------------|-------|-------|-------|
| 100.00     | 500.00    | 0.50       | CEP   | 7.84  | 19.33 |

  
 Parameter Table(Period 1 Experiment 1):  
 CUR: 10.00  
 TEM: 0.00  
 GS1: 12.00  
 GS2: 0.00  
 ihe: ON  
 IS: 5500.00  
 DP: 70.00  
 EP: 10.00

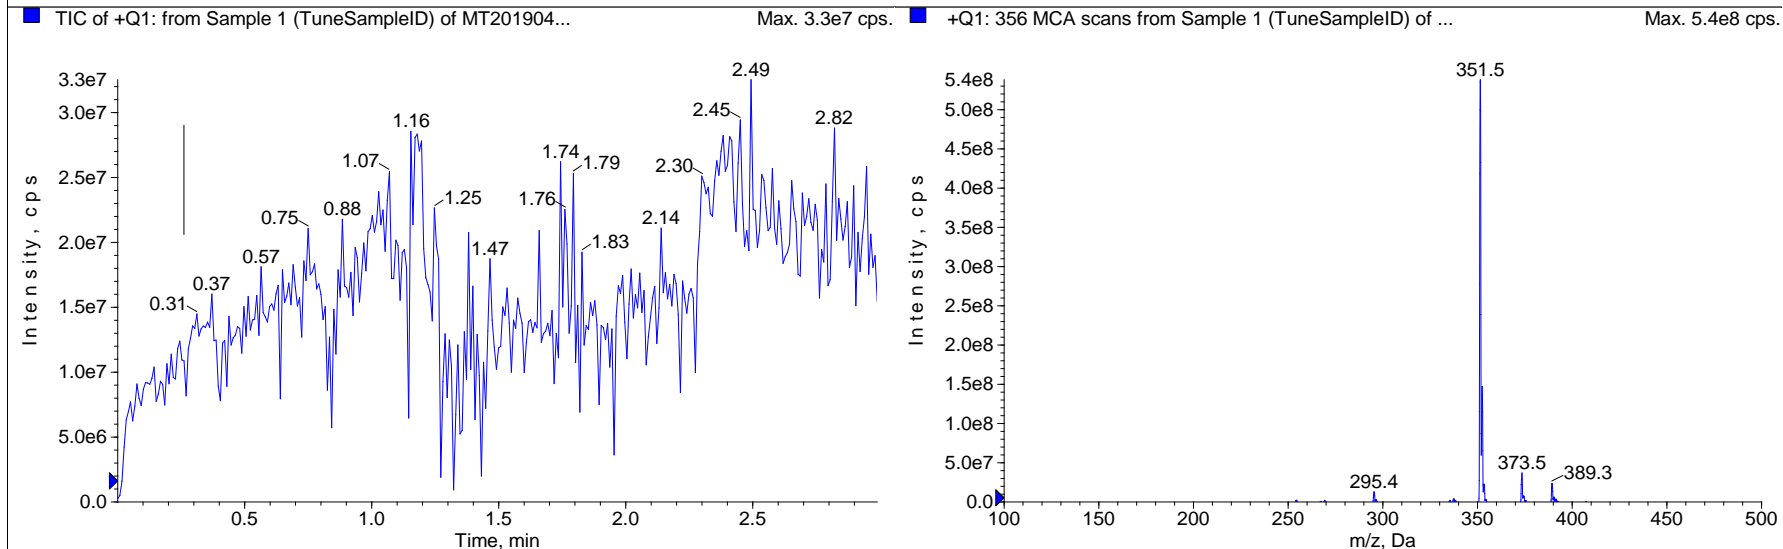

Supplement: ijms-20-02607-s001.pdf [file ijms-20-02607-s001.pdf]
